# Supplementary material for: Single-cell RNA-sequencing uncovers the dynamic changes of tumour immune microenvironment in advanced lung adenocarcinoma
Source: PubMed Central journal article supplement — BMJ Open Respir Res. 2023 Dec 11;10(1):e001878. doi: 10.1136/bmjresp-2023-001878 (PMC10729175; doi:10.1136/bmjresp-2023-001878), 2023-12-11
Supplement: bmjresp-2023-001878supp013.pdf [file bmjresp-2023-001878supp013.pdf]

Supplementary table S1. The number of cells in each subpopulation in different stage of LUAD.

| Stage    | GSE Accession | Sample | B    | CD4  | CD8  | Endothelial | Epithelial | Fibroblast | Mast | Myeloid | NK   | Treg | Total |
|----------|---------------|--------|------|------|------|-------------|------------|------------|------|---------|------|------|-------|
| normal   | GSE131907     | S01    | 77   | 125  | 775  | 29          | 161        | 14         | 220  | 1153    | 373  | 23   | 2950  |
| normal   | GSE131907     | S02    | 35   | 121  | 445  | 176         | 481        | 803        | 28   | 1310    | 626  | 33   | 4058  |
| normal   | GSE131907     | S03    | 54   | 125  | 816  | 85          | 547        | 174        | 65   | 1588    | 1412 | 23   | 4889  |
| normal   | GSE131907     | S04    | 26   | 143  | 904  | 9           | 135        | 9          | 30   | 1167    | 208  | 10   | 2641  |
| normal   | GSE131907     | S05    | 48   | 208  | 468  | 111         | 235        | 18         | 83   | 1236    | 734  | 24   | 3165  |
| normal   | GSE131907     | S06    | 85   | 129  | 346  | 49          | 337        | 50         | 99   | 1081    | 178  | 21   | 2375  |
| normal   | GSE131907     | S07    | 63   | 333  | 925  | 170         | 293        | 157        | 77   | 1956    | 300  | 81   | 4355  |
| normal   | GSE131907     | S08    | 43   | 201  | 559  | 385         | 156        | 75         | 184  | 1087    | 1037 | 20   | 3747  |
| normal   | GSE131907     | S09    | 33   | 252  | 592  | 73          | 263        | 15         | 151  | 3291    | 783  | 21   | 5474  |
| normal   | GSE131907     | S10    | 23   | 345  | 1212 | 10          | 207        | 12         | 50   | 661     | 634  | 36   | 3190  |
| normal   | GSE131907     | S11    | 41   | 228  | 1197 | 181         | 296        | 226        | 55   | 906     | 615  | 41   | 3786  |
| early    | GSE131907     | S12    | 516  | 525  | 785  | 52          | 92         | 472        | 95   | 564     | 39   | 177  | 3317  |
| early    | GSE131907     | S13    | 998  | 1241 | 554  | 12          | 9          | 196        | 93   | 266     | 18   | 286  | 3673  |
| early    | GSE131907     | S14    | 175  | 382  | 1297 | 21          | 78         | 17         | 52   | 1376    | 55   | 226  | 3679  |
| early    | GSE131907     | S15    | 274  | 353  | 466  | 17          | 291        | 182        | 86   | 976     | 14   | 248  | 2907  |
| early    | GSE131907     | S16    | 415  | 798  | 482  | 152         | 255        | 112        | 428  | 1149    | 184  | 229  | 4204  |
| early    | GSE131907     | S17    | 70   | 549  | 1237 | 2           | 299        | 17         | 83   | 862     | 78   | 542  | 3739  |
| early    | GSE131907     | S18    | 1554 | 902  | 382  | 29          | 184        | 18         | 178  | 686     | 88   | 218  | 4239  |
| early    | GSE131907     | S19    | 140  | 400  | 664  | 153         | 832        | 73         | 479  | 942     | 131  | 224  | 4038  |
| early    | GSE131907     | S20    | 36   | 69   | 191  | 19          | 1644       | 28         | 39   | 293     | 54   | 52   | 2425  |
| advanced | GSE131907     | S21    | 597  | 380  | 912  | 27          | 603        | 45         | 154  | 943     | 97   | 212  | 3970  |
| advanced | GSE131907     | S22    | 444  | 977  | 2231 | 126         | 166        | 458        | 119  | 376     | 139  | 321  | 5357  |
| advanced | GSE131907     | S23    | 111  | 279  | 197  | 1           | 891        | 2          | 1    | 371     | 126  | 10   | 1989  |
| advanced | GSE131907     | S24    | 6    | 47   | 121  | 3           | 3406       | 10         | 37   | 123     | 21   | 42   | 3816  |
| advanced | GSE131907     | S25    | 190  | 277  | 505  | 0           | 85         | 0          | 3    | 259     | 317  | 12   | 1648  |
| advanced | GSE131907     | S26    | 165  | 269  | 749  | 12          | 329        | 81         | 56   | 433     | 150  | 366  | 2610  |
| advanced | GSE148071     | S27    | 85   | 2    | 8    | 8           | 1565       | 11         | 5    | 51      | 1    | 1    | 1737  |
| advanced | GSE148071     | S28    | 129  | 17   | 16   | 8           | 517        | 115        | 103  | 1200    | 1    | 17   | 2123  |
| advanced | GSE148071     | S29    | 9    | 7    | 3    | 1           | 860        | 1          | 28   | 91      | 0    | 5    | 1005  |
| advanced | GSE148071     | S30    | 20   | 33   | 48   | 0           | 122        | 3          | 26   | 908     | 34   | 15   | 1209  |
| advanced | GSE148071     | S31    | 239  | 32   | 107  | 4           | 471        | 0          | 17   | 786     | 8    | 43   | 1707  |
| advanced | GSE148071     | S32    | 89   | 1    | 10   | 20          | 1423       | 9          | 2    | 599     | 2    | 1    | 2156  |
| advanced | GSE148071     | S33    | 142  | 23   | 20   | 2           | 460        | 40         | 64   | 465     | 0    | 12   | 1228  |
| advanced | GSE148071     | S34    | 169  | 2    | 25   | 303         | 2144       | 499        | 25   | 243     | 5    | 8    | 3423  |
