# Supplementary material for: Single-cell RNA-sequencing uncovers the dynamic changes of tumour immune microenvironment in advanced lung adenocarcinoma
Source: PubMed Central journal article supplement — BMJ Open Respir Res. 2023 Dec 11;10(1):e001878. doi: 10.1136/bmjresp-2023-001878 (PMC10729175; doi:10.1136/bmjresp-2023-001878), 2023-12-11
Supplement: bmjresp-2023-001878supp014.pdf [file bmjresp-2023-001878supp014.pdf]

Table with 40 columns of gene identifiers and numerical values. The table lists various genes such as 19H14.DMA, 19H14.DMA, 19H14.DMA, etc., with corresponding values in each column.

Table with 4 columns: ID, Name, Value, and another Name. The table lists various identifiers and their corresponding values, organized in a grid-like structure.

Table with 3 columns: Gene symbol (e.g., 500 NAKM2), Gene coordinates (e.g., 100 001 55182), and Gene function (e.g., 050 UGC2B). The table lists numerous genes and their genomic coordinates and functions.

Table with 4 columns: Gene Symbol, RefSeq ID, RefSeq Description, and RefSeq Length. The table lists numerous genes and their associated identifiers, such as 778 NMT1, 778 NMT2, 778 NMT3, etc., up to 908 PDLIM4.

Table with 10 columns of alphanumeric codes and numbers, representing a large dataset of identifiers and values.

Table with 4 columns: Gene ID, Gene Name, Chromosome, and Position. The table lists numerous genes such as 116R PSMAB, 116R PSMAC, 116R PSMAD, etc., along with their genomic coordinates.

Table with 4 columns: ID, Gene Symbol, Gene Name, and Value. The table lists numerous genes and their associated values, such as 1360 CHW139, 1361 SLC25A3, 1362 TLR2, etc.



Table with 4 columns: Gene Symbol, X Chromosome Position (Mb), Y Chromosome Position (Mb), and Gene Name. The table lists numerous genes and their genomic coordinates, such as 1568 WARS2, 1568 TRKB, 1568 MTRF1, etc., up to 1748 GSDMC2.





Table with 4 columns: ID, X, Y, Z. Contains a dense list of alphanumeric identifiers and numerical values, likely representing a coordinate system or data points for a 3D model.

Table with 4 columns: ID, Name, Value, and Unit. The table lists various identifiers and their corresponding values and units, such as 2381 ADH1141-1547, 2381 ADH1141-1547, 2381 ADH1141-1547, etc.

Table with 10 columns: ID, X1, X2, X3, X4, X5, X6, X7, X8, X9. Contains a dense grid of alphanumeric characters representing a dataset or codebook.

Table with 4 columns: Gene Symbol, Gene Name, RefSeq ID, and coordinates. The table lists numerous genes such as 2725 S2N, 2726 INKDC2, 2727 AD101B1, etc., with their corresponding identifiers and genomic coordinates.

Table with 100 columns of alphanumeric codes and values, representing a large dataset of identifiers and their associated numerical values.



Table with 4 columns: ID, X1, X2, X3. Contains a dense list of alphanumeric identifiers and numerical values, likely representing a dataset or a list of items with associated coordinates or weights.

Table with 10 columns: Gene ID, Gene Name, Chr, Start, End, Strand, RefSeq, Ensembl, UniProt, and other identifiers. The table lists numerous genes such as 3316 RAG2B, 3317 RAG2, 3318 RAG3, etc., with their genomic coordinates and associated identifiers.

Table with multiple columns containing alphanumeric codes and numerical values. The codes are organized in groups, such as 3509, 3510, 3511, etc., with sub-headers like 3509 9R9L2, 3510 9R9L1, etc. Each entry consists of a code followed by a series of numbers and letters, representing a specific identifier and its associated data points.

Table with 4 columns: ID, Gene, Value, Gene, Value, Gene, Value, Gene, Value. Contains a dense list of gene names and associated numerical values.

Table with 4 columns: ID, X, Y, Z. Contains a dense grid of numerical data points for various identifiers.

Table with 10 columns: Gene ID, Gene Name, RefSeq ID, RefSeq Name, RefSeq Description, RefSeq Accession, RefSeq Date, RefSeq Version, RefSeq Type, RefSeq Status. The table lists numerous genes and their associated identifiers.

Table with multiple columns containing alphanumeric codes (e.g., 4268 G6T4, 4268 H8A2) and numerical values. The table is organized in a grid-like structure with approximately 10 columns per row.

Table with 4 columns: ID, X, Y, Z. Contains a dense grid of alphanumeric characters representing a coordinate system or data points.



Table with multiple columns of alphanumeric codes and numerical values, likely representing a list of identifiers or data points.

Table with 4 columns: Gene ID, Gene Name, RefSeq ID, and RefSeq Name. The table lists numerous genes and their corresponding identifiers, such as 4870 HNRN, 4871 SFRP, 4872 WDR5, etc., up to 9085 CYP27B1.

Table with 10 columns containing alphanumeric codes and numerical values. The table lists various identifiers such as S068 UC7N, S068 UC7A, S068 UC7B, etc., followed by their corresponding numerical values across multiple columns.

Table with 10 columns of alphanumeric codes (e.g., S060 P030M, S061 C0001T1, S062 L12, etc.) and corresponding numerical values.

Table with 4 columns: ID, X, Y, Z. Contains a dense grid of alphanumeric characters representing a dataset or coordinate system.

Table with multiple columns containing alphanumeric codes and numerical values. The table is organized into several columns, with the first column being the most prominent and containing the majority of the data points.

Table with 10 columns: Gene ID, Gene Name, Chr, Start, End, Strand, RefSeq, Ensembl, UniProt, RefSeq, Ensembl, UniProt. The table lists numerous genes and their genomic coordinates across various chromosomes.

Table with 10 columns: ID, X1, X2, X3, X4, X5, X6, X7, X8, X9. Contains a dense grid of alphanumeric codes and values.



Table with 4 columns: ID, X, Y, Z. Contains a dense grid of alphanumeric characters representing a coordinate system or data points.

Table with 10 columns: Gene ID, Gene Name, RefSeq ID, RefSeq Name, RefSeq Description, RefSeq Accession, RefSeq Date, RefSeq Status, RefSeq Type, RefSeq Category. The table lists numerous genes and their associated identifiers.

Table with 4 columns: ID, X, Y, Z. Contains a dense grid of alphanumeric characters representing a coordinate system or data points.

Table with 10 columns of alphanumeric codes and values, representing a large dataset of identifiers and their corresponding numerical values.

Table with 4 columns: ID, X1, X2, X3. Contains a dense list of alphanumeric identifiers and numerical values, likely representing a dataset or a list of items.

Table with 10 columns: Gene symbol, RefSeq ID, Start, End, Strand, Feature, Start, End, Strand, Feature, Start, End, Strand, Feature. Lists genomic coordinates and features for various genes including ABCA1, ABCA2, ABCA3, ABCA4, ABCA5, ABCA6, ABCA7, ABCA8, ABCA9, ABCA10, ABCA11, ABCA12, ABCA13, ABCA14, ABCA15, ABCA16, ABCA17, ABCA18, ABCA19, ABCA20, ABCA21, ABCA22, ABCA23, ABCA24, ABCA25, ABCA26, ABCA27, ABCA28, ABCA29, ABCA30, ABCA31, ABCA32, ABCA33, ABCA34, ABCA35, ABCA36, ABCA37, ABCA38, ABCA39, ABCA40, ABCA41, ABCA42, ABCA43, ABCA44, ABCA45, ABCA46, ABCA47, ABCA48, ABCA49, ABCA50, ABCA51, ABCA52, ABCA53, ABCA54, ABCA55, ABCA56, ABCA57, ABCA58, ABCA59, ABCA60, ABCA61, ABCA62, ABCA63, ABCA64, ABCA65, ABCA66, ABCA67, ABCA68, ABCA69, ABCA70, ABCA71, ABCA72, ABCA73, ABCA74, ABCA75, ABCA76, ABCA77, ABCA78, ABCA79, ABCA80, ABCA81, ABCA82, ABCA83, ABCA84, ABCA85, ABCA86, ABCA87, ABCA88, ABCA89, ABCA90, ABCA91, ABCA92, ABCA93, ABCA94, ABCA95, ABCA96, ABCA97, ABCA98, ABCA99, ABCA100.

Table with 4 columns: Gene ID, Gene Name, RefSeq ID, and RefSeq Name. The table lists numerous genes such as 7405 C12orf66, 7406 C12orf67, 7407 C12orf68, etc., up to 7598 LOC101928. Each entry includes a numerical ID, a gene symbol, and its corresponding RefSeq identifier and name.

Table with 4 columns: Gene ID, Gene Name, RefSeq ID, and RefSeq Name. This table continues the list of genes from the previous table, starting with 7599 LOC101929 and ending with 7600 LOC101930. It follows the same format of Gene ID, Gene Name, RefSeq ID, and RefSeq Name.

Table with 5 columns: Gene ID, Gene Name, RefSeq ID, RefSeq Description, and Gene Location. It lists numerous genes such as 7601 FH4, 7601 FH5, 7601 GBI, etc., with their corresponding identifiers and genomic coordinates.



Table with 4 columns: Gene ID, Gene Name, RefSeq ID, and RefSeq Name. The table lists numerous genes such as 7786 RBM10, 7786 RBM11, 7786 RBM12, etc., with their corresponding identifiers and names.



Table with 10 columns: Gene ID, Gene Name, RefSeq ID, RefSeq Description, Gene ID, Gene Name, RefSeq ID, RefSeq Description, Gene ID, Gene Name, RefSeq ID, RefSeq Description. The table lists numerous genes and their associated identifiers.

Table with 4 columns: Gene ID, Gene Name, RefSeq ID, and coordinates. Lists various genes such as 8301 IER1, 8302 IER2, 8303 IER3, etc., with their corresponding RefSeq IDs and genomic coordinates.

Table with 4 columns: ID, Name, Value, and another Value. The table contains a dense list of alphanumeric identifiers and their corresponding numerical values, organized in a grid-like structure.



Table with 10 columns: ID, X, Y, Z, W, V, U, T, S, R. Contains a dense grid of alphanumeric characters representing genomic coordinates and identifiers.

A large table containing a list of genetic markers, each with a unique ID, a name, and associated numerical values (e.g., -0.44, 0.00, 0.01, etc.). The table is organized in columns and contains thousands of rows of data.



Table with 4 columns: Gene Symbol, chr, start, end, Gene Symbol, chr, start, end, Gene Symbol, chr, start, end, Gene Symbol, chr, start, end. It lists genomic coordinates for various genes across chromosomes 1-22.

Table with 4 columns: ID, Name, Value, and another Value. The table lists numerous identifiers and their corresponding values, organized in a grid-like structure.

Table with 10 columns: Gene ID, Gene Name, Value 1, Value 2, Value 3, Value 4, Value 5, Value 6, Value 7, Value 8. The table lists numerous genes such as 9748 SLC18B3, 9749 SLC16A9, 9750 SLC16A8, etc., with associated numerical values.

Table with 4 columns: ID, X1, X2, X3. Contains a dense list of alphanumeric identifiers and numerical values.

Table with 3 columns: Gene ID, Gene Name, and Value. The table lists numerous genes such as 101813, 101814, 101815, etc., with their corresponding values.

|             |      |     |        |      |     |         |      |     |       |       |     |      |     |          |      |     |         |      |     |          |       |     |         |      |     |        |      |     |
|-------------|------|-----|--------|------|-----|---------|------|-----|-------|-------|-----|------|-----|----------|------|-----|---------|------|-----|----------|-------|-----|---------|------|-----|--------|------|-----|
| 10300 WJF3  | -021 | 010 | STK0A  | -448 | 000 | ADG5L1  | -143 | 000 | EC70A | -1843 | 000 | 1980 | 000 | SC129A   | 339  | 000 | 1980C2A | 020  | 010 | GGNF-AS1 | -1248 | 000 | 1980D0A | -118 | 000 | PGC2   | -243 | 022 |
| 10301 ZCZC3 | -074 | 014 | WV11   | -129 | 004 | WV11    | -143 | 000 | FN031 | -1843 | 000 | 1980 | 000 | FMAB02A  | 332  | 000 | 1980F0A | -037 | 010 | AD0029E2 | -1319 | 000 | 1980G0A | -039 | 010 | DC07   | -049 | 022 |
| 10302 X0D1  | -178 | 010 | MAKRA  | -094 | 000 | TRF0R   | -407 | 000 | ZB703 | -1843 | 000 | 1980 | 000 | SID047   | 361  | 000 | 1980P01 | -102 | 010 | ACT10R   | -1147 | 000 | 1980R0A | -070 | 000 | GNL3L  | -049 | 022 |
| 10303 M0P5S | -047 | 007 | EM029  | -044 | 000 | EM029   | -044 | 000 | EM029 | -1843 | 000 | 1980 | 000 | AD0029E2 | 244  | 000 | 1980Q01 | -037 | 010 | ACT10R   | -1147 | 000 | 1980S0A | -070 | 000 | GNL3L  | -049 | 022 |
| 10304 M1K31 | -185 | 001 | LMBR02 | -072 | 000 | PTFCR   | -449 | 000 | BB025 | -1843 | 000 | 1980 | 000 | MEM028   | 157  | 000 | 1980T01 | -201 | 010 | STAF0A9  | -1107 | 000 | 1980U0A | -038 | 000 | PNF08L | -039 | 022 |
| 10305 W0M02 | -170 | 003 | W0M02  | -170 | 003 | W0M02   | -170 | 003 | W0M02 | -1843 | 000 | 1980 | 000 | W0M02    | 157  | 000 | 1980V01 | -201 | 010 | STAF0A9  | -1107 | 000 | 1980W0A | -038 | 000 | PNF08L | -039 | 022 |
| 10306 PALM0 | -427 | 001 | MA008  | -030 | 000 | AP00709 | -055 | 000 | LR054 | -1843 | 000 | 1980 | 000 | ZNF10    | -001 | 010 | 1980X01 | -001 | 010 | MA008    | -030  | 000 | 1980Y0A | -038 | 000 | FU02   | -334 | 022 |
| 10307 W0K11 | -143 | 003 | W0K11  | -143 | 003 | W0K11   | -143 | 003 | W0K11 | -1843 | 000 | 1980 | 000 | W0K11    | 157  | 000 | 1980Z01 | -201 | 010 | STAF0A9  | -1107 | 000 | 198100A | -038 | 000 | PNF08L | -039 | 022 |
| 10308 M0P5S | -427 | 001 | MA008  | -030 | 000 | AP00709 | -055 | 000 | LR054 | -1843 | 000 | 1980 | 000 | ZNF10    | -001 | 010 | 1981101 | -001 | 010 | MA008    | -030  | 000 | 198120A | -038 | 000 | FU02   | -334 | 022 |
| 10309 W0K11 | -143 | 003 | W0K11  | -143 | 003 | W0K11   | -143 | 003 | W0K11 | -1843 | 000 | 1980 | 000 | W0K11    | 157  | 000 | 1981301 | -001 | 010 | MA008    | -030  | 000 | 198140A | -038 | 000 | FU02   | -334 | 022 |
| 10310 X0D1  | -178 | 010 | MAKRA  | -094 | 000 | TRF0R   | -407 | 000 | ZB703 | -1843 | 000 | 1980 | 000 | SID047   | 361  | 000 | 1981501 | -001 | 010 | MA008    | -030  | 000 | 198160A | -038 | 000 | FU02   | -334 | 022 |
| 10311 W0K11 | -143 | 003 | W0K11  | -143 | 003 | W0K11   | -143 | 003 | W0K11 | -1843 | 000 | 1980 | 000 | W0K11    | 157  | 000 | 1981701 | -001 | 010 | MA008    | -030  | 000 | 198180A | -038 | 000 | FU02   | -334 | 022 |
| 10312 X0D1  | -178 | 010 | MAKRA  | -094 | 000 | TRF0R   | -407 | 000 | ZB703 | -1843 | 000 | 1980 | 000 | SID047   | 361  | 000 | 1981901 | -001 | 010 | MA008    | -030  | 000 | 198200A | -038 | 000 | FU02   | -334 | 022 |
| 10313 W0K11 | -143 | 003 | W0K11  | -143 | 003 | W0K11   | -143 | 003 | W0K11 | -1843 | 000 | 1980 | 000 | W0K11    | 157  | 000 | 1982101 | -001 | 010 | MA008    | -030  | 000 | 198220A | -038 | 000 | FU02   | -334 | 022 |
| 10314 W0K11 | -143 | 003 | W0K11  | -143 | 003 | W0K11   | -143 | 003 | W0K11 | -1843 | 000 | 1980 | 000 | W0K11    | 157  | 000 | 1982301 | -001 | 010 | MA008    | -030  | 000 | 198240A | -038 | 000 | FU02   | -334 | 022 |
| 10315 W0K11 | -143 | 003 | W0K11  | -143 | 003 | W0K11   | -143 | 003 | W0K11 | -1843 | 000 | 1980 | 000 | W0K11    | 157  | 000 | 1982501 | -001 | 010 | MA008    | -030  | 000 | 198260A | -038 | 000 | FU02   | -334 | 022 |
| 10316 W0K11 | -143 | 003 | W0K11  | -143 | 003 | W0K11   | -143 | 003 | W0K11 | -1843 | 000 | 1980 | 000 | W0K11    | 157  | 000 | 1982701 | -001 | 010 | MA008    | -030  | 000 | 198280A | -038 | 000 | FU02   | -334 | 022 |
| 10317 W0K11 | -143 | 003 | W0K11  | -143 | 003 | W0K11   | -143 | 003 | W0K11 | -1843 | 000 | 1980 | 000 | W0K11    | 157  | 000 | 1982901 | -001 | 010 | MA008    | -030  | 000 | 198300A | -038 | 000 | FU02   | -334 | 022 |
| 10318 W0K11 | -143 | 003 | W0K11  | -143 | 003 | W0K11   | -143 | 003 | W0K11 | -1843 | 000 | 1980 | 000 | W0K11    | 157  | 000 | 1983101 | -001 | 010 | MA008    | -030  | 000 | 198320A | -038 | 000 | FU02   | -334 | 022 |
| 10319 W0K11 | -143 | 003 | W0K11  | -143 | 003 | W0K11   | -143 | 003 | W0K11 | -1843 | 000 | 1980 | 000 | W0K11    | 157  | 000 | 1983301 | -001 | 010 | MA008    | -030  | 000 | 198340A | -038 | 000 | FU02   | -334 | 022 |
| 10320 W0K11 | -143 | 003 | W0K11  | -143 | 003 | W0K11   | -143 | 003 | W0K11 | -1843 | 000 | 1980 | 000 | W0K11    | 157  | 000 | 1983501 | -001 | 010 | MA008    | -030  | 000 | 198360A | -038 | 000 | FU02   | -334 | 022 |
| 10321 W0K11 | -143 | 003 | W0K11  | -143 | 003 | W0K11   | -143 | 003 | W0K11 | -1843 | 000 | 1980 | 000 | W0K11    | 157  | 000 | 1983701 | -001 | 010 | MA008    | -030  | 000 | 198380A | -038 | 000 | FU02   | -334 | 022 |
| 10322 W0K11 | -143 | 003 | W0K11  | -143 | 003 | W0K11   | -143 | 003 | W0K11 | -1843 | 000 | 1980 | 000 | W0K11    | 157  | 000 | 1983901 | -001 | 010 | MA008    | -030  | 000 | 198400A | -038 | 000 | FU02   | -334 | 022 |
| 10323 W0K11 | -143 | 003 | W0K11  | -143 | 003 | W0K11   | -143 | 003 | W0K11 | -1843 | 000 | 1980 | 000 | W0K11    | 157  | 000 | 1984101 | -001 | 010 | MA008    | -030  | 000 | 198420A | -038 | 000 | FU02   | -334 | 022 |
| 10324 W0K11 | -143 | 003 | W0K11  | -143 | 003 | W0K11   | -143 | 003 | W0K11 | -1843 | 000 | 1980 | 000 | W0K11    | 157  | 000 | 1984301 | -001 | 010 | MA008    | -030  | 000 | 198440A | -038 | 000 | FU02   | -334 | 022 |
| 10325 W0K11 | -143 | 003 | W0K11  | -143 | 003 | W0K11   | -143 | 003 | W0K11 | -1843 | 000 | 1980 | 000 | W0K11    | 157  | 000 | 1984501 | -001 | 010 | MA008    | -030  | 000 | 198460A | -038 | 000 | FU02   | -334 | 022 |
| 10326 W0K11 | -143 | 003 | W0K11  | -143 | 003 | W0K11   | -143 | 003 | W0K11 | -1843 | 000 | 1980 | 000 | W0K11    | 157  | 000 | 1984701 | -001 | 010 | MA008    | -030  | 000 | 198480A | -038 | 000 | FU02   | -334 | 022 |
| 10327 W0K11 | -143 | 003 | W0K11  | -143 | 003 | W0K11   | -143 | 003 | W0K11 | -1843 | 000 | 1980 | 000 | W0K11    | 157  | 000 | 1984901 | -001 | 010 | MA008    | -030  | 000 | 198500A | -038 | 000 | FU02   | -334 | 022 |
| 10328 W0K11 | -143 | 003 | W0K11  | -143 | 003 | W0K11   | -143 | 003 | W0K11 | -1843 | 000 | 1980 | 000 | W0K11    | 157  | 000 | 1985101 | -001 | 010 | MA008    | -030  | 000 | 198520A | -038 | 000 | FU02   | -334 | 022 |
| 10329 W0K11 | -143 | 003 | W0K11  | -143 | 003 | W0K11   | -143 | 003 | W0K11 | -1843 | 000 | 1980 | 000 | W0K11    | 157  | 000 | 1985301 | -001 | 010 | MA008    | -030  | 000 | 198540A | -038 | 000 | FU02   | -334 | 022 |
| 10330 W0K11 | -143 | 003 | W0K11  | -143 | 003 | W0K11   | -143 | 003 | W0K11 | -1843 | 000 | 1980 | 000 | W0K11    | 157  | 000 | 1985501 | -001 | 010 | MA008    | -030  | 000 | 198560A | -038 | 000 | FU02   | -334 | 022 |
| 10331 W0K11 | -143 | 003 | W0K11  | -143 | 003 | W0K11   | -143 | 003 | W0K11 | -1843 | 000 | 1980 | 000 | W0K11    | 157  | 000 | 1985701 | -001 | 010 | MA008    | -030  | 000 | 198580A | -038 | 000 | FU02   | -334 | 022 |
| 10332 W0K11 | -143 | 003 | W0K11  | -143 | 003 | W0K11   | -143 | 003 | W0K11 | -1843 | 000 | 1980 | 000 | W0K11    | 157  | 000 | 1985901 | -001 | 010 | MA008    | -030  | 000 | 198600A | -038 | 000 | FU02   | -334 | 022 |
| 10333 W0K11 | -143 | 003 | W0K11  | -143 | 003 | W0K11   | -143 | 003 | W0K11 | -1843 | 000 | 1980 | 000 | W0K11    | 157  | 000 | 1986101 | -001 | 010 | MA008    | -030  | 000 | 198620A | -038 | 000 | FU02   | -334 | 022 |
| 10334 W0K11 | -143 | 003 | W0K11  | -143 | 003 | W0K11   | -143 | 003 | W0K11 | -1843 | 000 | 1980 | 000 | W0K11    | 157  | 000 | 1986301 | -001 | 010 | MA008    | -030  | 000 | 198640A | -038 | 000 | FU02   | -334 | 022 |
| 10335 W0K11 | -143 | 003 | W0K11  | -143 | 003 | W0K11   | -143 | 003 | W0K11 | -1843 | 000 | 1980 | 000 | W0K11    | 157  | 000 | 1986501 | -001 | 010 | MA008    | -030  | 000 | 198660A | -038 | 000 | FU02   | -334 | 022 |
| 10336 W0K11 | -143 | 003 | W0K11  | -143 | 003 | W0K11   | -143 | 003 | W0K11 | -1843 | 000 | 1980 | 000 | W0K11    | 157  | 000 | 1986701 | -001 | 010 | MA008    | -030  | 000 | 198680A | -038 | 000 | FU02   | -334 | 022 |
| 10337 W0K11 | -143 | 003 | W0K11  | -143 | 003 | W0K11   | -143 | 003 | W0K11 | -1843 | 000 | 1980 | 000 | W0K11    | 157  | 000 | 1986901 | -001 | 010 | MA008    | -030  | 000 | 198700A | -038 | 000 | FU02   | -334 | 022 |
| 10338 W0K11 | -143 | 003 | W0K11  | -143 | 003 | W0K11   | -143 | 003 | W0K11 | -1843 | 000 | 1980 | 000 | W0K11    | 157  | 000 | 1987101 | -001 | 010 | MA008    | -030  | 000 | 198720A | -038 | 000 | FU02   | -334 | 022 |
| 10339 W0K11 | -143 | 003 | W0K11  | -143 | 003 | W0K11   | -143 | 003 | W0K11 | -1843 | 000 | 1980 | 000 | W0K11    | 157  | 000 | 1987301 | -001 | 010 | MA008    | -030  | 000 | 198740A | -038 | 000 | FU02   | -334 | 022 |
| 10340 W0K11 | -143 | 003 | W0K11  | -143 | 003 | W0K11   | -143 | 003 | W0K11 | -1843 | 000 | 1980 | 000 | W0K11    | 157  | 000 | 1987501 | -001 | 010 | MA008    | -030  | 000 | 198760A | -038 | 000 | FU02   | -334 | 022 |
| 10341 W0K11 | -143 | 003 | W0K11  | -143 | 003 | W0K11   | -143 | 003 | W0K11 | -1843 | 000 | 1980 | 000 | W0K11    | 157  | 000 | 1987701 | -001 | 010 | MA008    | -030  | 000 | 198780A | -038 | 000 | FU02   | -334 | 022 |
| 10342 W0K11 | -143 | 003 | W0K11  | -143 | 003 | W0K11   | -143 | 003 | W0K11 | -1843 | 000 | 1980 | 000 | W0K11    | 157  | 000 | 1987901 | -001 | 010 | MA008    | -030  | 000 | 198800A | -038 | 000 | FU02   | -334 | 022 |
| 10343 W0K11 | -143 | 003 | W0K11  | -143 | 003 | W0K11   | -143 | 003 | W0K11 | -1843 | 000 | 1980 | 000 | W0K11    | 157  | 000 | 1988101 | -001 | 010 | MA008    | -030  | 000 | 198820A | -038 | 000 | FU02   | -334 | 022 |
| 10344 W0K11 | -143 | 003 | W0K11  | -143 | 003 | W0K11   | -143 | 003 | W0K11 | -1843 | 000 | 1980 | 000 | W0K11    | 157  | 000 | 1988301 | -001 | 010 | MA008    | -030  | 000 | 198840A | -038 | 000 | FU02   | -334 | 022 |
| 10345 W0K11 | -143 | 003 | W0K11  | -143 | 003 | W0K11   | -143 | 003 | W0K11 | -1843 | 000 | 1980 | 000 | W0K11    | 157  | 000 | 1988501 | -001 | 010 | MA008    | -030  | 000 | 198860A | -038 | 000 | FU02   | -334 | 022 |
| 10346 W0K11 | -143 | 003 | W0K11  | -143 | 003 | W0K11   |      |     |       |       |     |      |     |          |      |     |         |      |     |          |       |     |         |      |     |        |      |     |



Table with 4 columns: Gene symbol, Gene name, Chromosome, and coordinates. The table lists numerous genes such as LOC101928, LOC101929, LOC101930, etc., with their corresponding genomic locations.



Table with 4 columns: Gene Name, RefSeq ID, Start, End, Strand, and Coordinates. Lists numerous genes and their genomic coordinates across various chromosomes.

Table with 4 columns: ID, Gene, Value, and another Value. The table lists numerous genes such as 11101 CBR4, 11101 CBR2, 11101 CBR1, etc., with associated numerical values.

|               |      |      |         |      |      |           |      |      |            |      |      |          |      |      |          |      |      |         |      |      |           |      |      |        |      |      |         |      |      |
|---------------|------|------|---------|------|------|-----------|------|------|------------|------|------|----------|------|------|----------|------|------|---------|------|------|-----------|------|------|--------|------|------|---------|------|------|
| 11308 T89A0   | -442 | 0.00 | GAMT    | -024 | 0.00 | SLC26A11  | -035 | 0.00 | CLDN8      | -039 | 0.00 | SOX1-AS1 | 478  | 0.00 | IT7      | 479  | 0.00 | CCAT7   | -141 | 0.00 | NR2F36    | -174 | 0.00 | MMMP9  | -190 | 0.00 | CHMR2   | -031 | 0.00 |
| 11308 C89E2   | -102 | 0.00 | SLC6A6  | -021 | 0.00 | UCAT1     | -215 | 0.00 | NOTD       | -029 | 1.00 | IT7-AS2  | 478  | 0.00 | ANGPT4   | -132 | 0.00 | SRM8A   | -177 | 0.00 | NR2F36    | -174 | 0.00 | MMMP9  | -190 | 0.00 | CHMR2   | -031 | 0.00 |
| 11308 F8E2    | -103 | 0.00 | PRMT2   | -012 | 0.00 | LUMI1A    | -192 | 0.00 | NOTD       | -029 | 1.00 | IT7-AS2  | 478  | 0.00 | ANGPT4   | -132 | 0.00 | SRM8A   | -177 | 0.00 | NR2F36    | -174 | 0.00 | MMMP9  | -190 | 0.00 | CHMR2   | -031 | 0.00 |
| 11308 TRAU    | -447 | 0.00 | PRMT2   | -012 | 0.00 | LUMI1A    | -192 | 0.00 | NOTD       | -029 | 1.00 | IT7-AS2  | 478  | 0.00 | ANGPT4   | -132 | 0.00 | SRM8A   | -177 | 0.00 | NR2F36    | -174 | 0.00 | MMMP9  | -190 | 0.00 | CHMR2   | -031 | 0.00 |
| 11311 T18A    | -024 | 0.00 | NDCD1   | -095 | 0.00 | MTOR      | -010 | 0.00 | CD46       | -014 | 0.00 | ITEL-AS1 | 199  | 0.00 | ANGPT4   | -132 | 0.00 | SRM8A   | -177 | 0.00 | NR2F36    | -174 | 0.00 | MMMP9  | -190 | 0.00 | CHMR2   | -031 | 0.00 |
| 11312 T89D    | -054 | 0.00 | PRMT2   | -012 | 0.00 | LUMI1A    | -192 | 0.00 | NOTD       | -029 | 1.00 | IT7-AS2  | 478  | 0.00 | ANGPT4   | -132 | 0.00 | SRM8A   | -177 | 0.00 | NR2F36    | -174 | 0.00 | MMMP9  | -190 | 0.00 | CHMR2   | -031 | 0.00 |
| 11313 O3A     | -022 | 0.00 | ROR     | -047 | 0.00 | ZNF703    | 047  | 0.00 | TMEM127    | -044 | 0.00 | HELI1    | 068  | 0.00 | NR6      | -016 | 0.00 | MCE1    | -014 | 0.00 | CASC20    | -190 | 0.00 | CSC21  | -190 | 0.00 | GCAT    | -159 | 0.00 |
| 11314 F89K    | -093 | 0.00 | PRMT2   | -012 | 0.00 | LUMI1A    | -192 | 0.00 | NOTD       | -029 | 1.00 | IT7-AS2  | 478  | 0.00 | ANGPT4   | -132 | 0.00 | SRM8A   | -177 | 0.00 | NR2F36    | -174 | 0.00 | MMMP9  | -190 | 0.00 | CHMR2   | -031 | 0.00 |
| 11315 A82R1   | -482 | 0.00 | HGCG18  | -018 | 0.00 | DNAH9     | 034  | 0.00 | GRR        | -251 | 0.00 | LEF2A2   | 358  | 0.00 | NR6      | -016 | 0.00 | MCE1    | -014 | 0.00 | CASC20    | -190 | 0.00 | CSC21  | -190 | 0.00 | GCAT    | -159 | 0.00 |
| 11316 M121A   | -019 | 0.00 | POU3    | -090 | 0.00 | ADAM14    | -136 | 0.00 | DCAMK1-AS1 | -030 | 0.00 | SLC35A1  | 478  | 0.00 | IT7-AS2  | 478  | 0.00 | CCAT7   | -141 | 0.00 | NR2F36    | -174 | 0.00 | MMMP9  | -190 | 0.00 | CHMR2   | -031 | 0.00 |
| 11317 A3T5D   | -010 | 0.00 | HNF4B1  | -010 | 0.00 | ZNF484    | -211 | 0.00 | HSTH2PH8   | -077 | 0.00 | SLC35A1  | 478  | 0.00 | IT7-AS2  | 478  | 0.00 | CCAT7   | -141 | 0.00 | NR2F36    | -174 | 0.00 | MMMP9  | -190 | 0.00 | CHMR2   | -031 | 0.00 |
| 11318 N10D12  | -040 | 0.00 | DNAH9   | -034 | 0.00 | ITFC2     | -348 | 0.00 | NOTD       | -029 | 1.00 | IT7-AS2  | 478  | 0.00 | ANGPT4   | -132 | 0.00 | SRM8A   | -177 | 0.00 | NR2F36    | -174 | 0.00 | MMMP9  | -190 | 0.00 | CHMR2   | -031 | 0.00 |
| 11319 S99A12  | -140 | 0.00 | AT      | -377 | 0.00 | C17orf132 | -045 | 0.00 | NOTD       | -029 | 1.00 | IT7-AS2  | 478  | 0.00 | ANGPT4   | -132 | 0.00 | SRM8A   | -177 | 0.00 | NR2F36    | -174 | 0.00 | MMMP9  | -190 | 0.00 | CHMR2   | -031 | 0.00 |
| 11320 T18A    | -122 | 0.00 | ROR     | -047 | 0.00 | ZNF703    | 047  | 0.00 | TMEM127    | -044 | 0.00 | HELI1    | 068  | 0.00 | NR6      | -016 | 0.00 | MCE1    | -014 | 0.00 | CASC20    | -190 | 0.00 | CSC21  | -190 | 0.00 | GCAT    | -159 | 0.00 |
| 11321 F8E4    | -045 | 0.00 | PRMT2   | -012 | 0.00 | LUMI1A    | -192 | 0.00 | NOTD       | -029 | 1.00 | IT7-AS2  | 478  | 0.00 | ANGPT4   | -132 | 0.00 | SRM8A   | -177 | 0.00 | NR2F36    | -174 | 0.00 | MMMP9  | -190 | 0.00 | CHMR2   | -031 | 0.00 |
| 11322 F9A4    | -102 | 0.00 | LRG1    | -442 | 0.00 | PRMT2     | -012 | 0.00 | HNRH3-AS1  | -196 | 0.00 | ITFC2    | -348 | 0.00 | NOTD     | -029 | 1.00 | IT7-AS2 | 478  | 0.00 | ANGPT4    | -132 | 0.00 | SRM8A  | -177 | 0.00 | NR2F36  | -174 | 0.00 |
| 11323 O3A     | -022 | 0.00 | ROR     | -047 | 0.00 | ZNF703    | 047  | 0.00 | TMEM127    | -044 | 0.00 | HELI1    | 068  | 0.00 | NR6      | -016 | 0.00 | MCE1    | -014 | 0.00 | CASC20    | -190 | 0.00 | CSC21  | -190 | 0.00 | GCAT    | -159 | 0.00 |
| 11324 M3A     | -102 | 0.00 | MMP1    | -241 | 0.00 | CD46      | -014 | 0.00 | FAM189A    | -186 | 0.00 | ZNF484   | -211 | 0.00 | HSTH2PH8 | -077 | 0.00 | SLC35A1 | 478  | 0.00 | IT7-AS2   | 478  | 0.00 | CCAT7  | -141 | 0.00 | NR2F36  | -174 | 0.00 |
| 11325 C2D4A   | -188 | 0.00 | HNF1    | -150 | 0.00 | HNF1A     | -354 | 0.00 | NOTD       | -029 | 1.00 | IT7-AS2  | 478  | 0.00 | ANGPT4   | -132 | 0.00 | SRM8A   | -177 | 0.00 | NR2F36    | -174 | 0.00 | MMMP9  | -190 | 0.00 | CHMR2   | -031 | 0.00 |
| 11326 C2D4C14 | -015 | 0.00 | DUXO3   | -131 | 0.00 | GATB      | -111 | 0.00 | BDNF       | -199 | 0.00 | ZNF484   | -211 | 0.00 | HSTH2PH8 | -077 | 0.00 | SLC35A1 | 478  | 0.00 | IT7-AS2   | 478  | 0.00 | CCAT7  | -141 | 0.00 | NR2F36  | -174 | 0.00 |
| 11327 M8C0    | -153 | 0.00 | HNF1    | -150 | 0.00 | HNF1A     | -354 | 0.00 | NOTD       | -029 | 1.00 | IT7-AS2  | 478  | 0.00 | ANGPT4   | -132 | 0.00 | SRM8A   | -177 | 0.00 | NR2F36    | -174 | 0.00 | MMMP9  | -190 | 0.00 | CHMR2   | -031 | 0.00 |
| 11328 TAF1    | -050 | 0.00 | MAMLI1  | -050 | 0.00 | FUT11     | -111 | 0.00 | SLC43A     | -004 | 0.00 | RHOA2    | 381  | 0.00 | ITFC2    | -348 | 0.00 | NOTD    | -029 | 1.00 | IT7-AS2   | 478  | 0.00 | CCAT7  | -141 | 0.00 | NR2F36  | -174 | 0.00 |
| 11329 A48C3C1 | -077 | 0.00 | SMO6B   | -046 | 0.00 | MMX2      | -050 | 0.00 | ZNF71      | 027  | 0.00 | ZNF484   | -211 | 0.00 | HSTH2PH8 | -077 | 0.00 | SLC35A1 | 478  | 0.00 | IT7-AS2   | 478  | 0.00 | CCAT7  | -141 | 0.00 | NR2F36  | -174 | 0.00 |
| 11330 D2C1    | -138 | 0.00 | HNF4    | 008  | 0.00 | IPAK      | -063 | 0.00 | TBRX8      | 013  | 0.00 | UNC53B   | 422  | 0.00 | UNC53B   | 422  | 0.00 | UNC53B  | 422  | 0.00 | UNC53B    | 422  | 0.00 | UNC53B | 422  | 0.00 | UNC53B  | 422  | 0.00 |
| 11331 C13C    | -108 | 0.00 | JAMMP2  | -127 | 0.00 | ANKRD6    | -139 | 0.00 | ANKRD6     | -139 | 0.00 | CRO73    | -033 | 0.00 | RFC6     | -147 | 0.00 | PTPFR14 | -484 | 0.00 | CFHR4     | -048 | 0.00 | DMG1   | -042 | 0.00 | SDS24C1 | -219 | 0.00 |
| 11332 F89D    | -112 | 0.00 | THRAP3  | -033 | 0.00 | PALCA     | -151 | 0.00 | SPAST      | 035  | 0.00 | UNC53B   | 422  | 0.00 | UNC53B   | 422  | 0.00 | UNC53B  | 422  | 0.00 | UNC53B    | 422  | 0.00 | UNC53B | 422  | 0.00 | UNC53B  | 422  | 0.00 |
| 11333 M8D8    | -168 | 0.00 | ZK      | -014 | 0.00 | ABHD13    | 030  | 0.00 | ABCA3      | -035 | 0.00 | FANC8    | 004  | 0.00 | CNTF     | -157 | 0.00 | MACROD2 | -281 | 0.00 | KIF3B3    | -182 | 0.00 | AP5L2  | -030 | 0.00 | FOXA1   | -028 | 0.00 |
| 11334 F89L4   | -058 | 0.00 | DRE1    | -033 | 0.00 | NARS2     | -083 | 0.00 | BE89       | 04   | 0.00 | UTS1B2   | 843  | 0.00 | MORC4    | -168 | 0.00 | RBM4    | -012 | 0.00 | NDUF2-AS2 | -158 | 0.00 | HTBA2  | 042  | 0.00 | PGC4    | -024 | 0.00 |
| 11335 F89L5   | -157 | 0.00 | DRG2    | -237 | 0.00 | PPP2R3    | 002  | 0.00 | ACOR4A     | -221 | 0.00 | HIF1F3   | 287  | 0.00 | SPY5     | -157 | 0.00 | FRS2    | -017 | 0.00 | NDUF2-AS2 | -158 | 0.00 | HTBA2  | 042  | 0.00 | PGC4    | -024 | 0.00 |
| 11336 F89L6   | -049 | 0.00 | HAZ1    | -016 | 0.00 | ABCF3     | 000  | 0.00 | AMC58      | 027  | 0.00 | CERAM    | -028 | 0.00 | TRX2     | -152 | 0.00 | CEACCP2 | -078 | 0.00 | GRP3C2    | -180 | 0.00 | PHK1   | -011 | 0.00 | INAM2   | -151 | 0.00 |
| 11337 F89L7   | -019 | 0.00 | HNF1O1  | -013 | 0.00 | PCNA      | 010  | 0.00 | TWAP       | 026  | 0.00 | ZNF484   | -211 | 0.00 | HSTH2PH8 | -077 | 0.00 | SLC35A1 | 478  | 0.00 | IT7-AS2   | 478  | 0.00 | CCAT7  | -141 | 0.00 | NR2F36  | -174 | 0.00 |
| 11338 F89L8   | -049 | 0.00 | HAZ1    | -016 | 0.00 | ABCF3     | 000  | 0.00 | AMC58      | 027  | 0.00 | CERAM    | -028 | 0.00 | TRX2     | -152 | 0.00 | CEACCP2 | -078 | 0.00 | GRP3C2    | -180 | 0.00 | PHK1   | -011 | 0.00 | INAM2   | -151 | 0.00 |
| 11339 F89L9   | -049 | 0.00 | HAZ1    | -016 | 0.00 | ABCF3     | 000  | 0.00 | AMC58      | 027  | 0.00 | CERAM    | -028 | 0.00 | TRX2     | -152 | 0.00 | CEACCP2 | -078 | 0.00 | GRP3C2    | -180 | 0.00 | PHK1   | -011 | 0.00 | INAM2   | -151 | 0.00 |
| 11340 D2C2B   | -058 | 0.00 | RARL    | -053 | 0.00 | HSPB1     | -027 | 0.00 | RLR2       | -002 | 0.00 | ZNF484   | -211 | 0.00 | HSTH2PH8 | -077 | 0.00 | SLC35A1 | 478  | 0.00 | IT7-AS2   | 478  | 0.00 | CCAT7  | -141 | 0.00 | NR2F36  | -174 | 0.00 |
| 11341 F89L10  | -140 | 0.00 | FAM189A | -186 | 0.00 | ITFC2     | -348 | 0.00 | NOTD       | -029 | 1.00 | IT7-AS2  | 478  | 0.00 | ANGPT4   | -132 | 0.00 | SRM8A   | -177 | 0.00 | NR2F36    | -174 | 0.00 | MMMP9  | -190 | 0.00 | CHMR2   | -031 | 0.00 |
| 11342 F89L11  | -039 | 0.00 | THAP3   | -033 | 0.00 | PALCA     | -151 | 0.00 | SPAST      | 035  | 0.00 | UNC53B   | 422  | 0.00 | UNC53B   | 422  | 0.00 | UNC53B  | 422  | 0.00 | UNC53B    | 422  | 0.00 | UNC53B | 422  | 0.00 | UNC53B  | 422  | 0.00 |
| 11343 F89L12  | -148 | 0.00 | HNF4    | 008  | 0.00 | IPAK      | -063 | 0.00 | TBRX8      | 013  | 0.00 | CRO73    | -033 | 0.00 | RFC6     | -147 | 0.00 | PTPFR14 | -484 | 0.00 | CFHR4     | -048 | 0.00 | DMG1   | -042 | 0.00 | SDS24C1 | -219 | 0.00 |
| 11344 F89L13  | -029 | 0.00 | DMO     | -064 | 0.00 | ZNF703    | 047  | 0.00 | TMEM127    | -044 | 0.00 | HELI1    | 068  | 0.00 | NR6      | -016 | 0.00 | MCE1    | -014 | 0.00 | CASC20    | -190 | 0.00 | CSC21  | -190 | 0.00 | GCAT    | -159 | 0.00 |
| 11345 F89L14  | -029 | 0.00 | DMO     | -064 | 0.00 | ZNF703    | 047  | 0.00 | TMEM127    | -044 | 0.00 | HELI1    | 068  | 0.00 | NR6      | -016 | 0.00 | MCE1    | -014 | 0.00 | CASC20    | -190 | 0.00 | CSC21  | -190 | 0.00 | GCAT    | -159 | 0.00 |
| 11346 F89L15  | -029 | 0.00 | DMO     | -064 | 0.00 | ZNF703    | 047  | 0.00 | TMEM127    | -044 | 0.00 | HELI1    | 068  | 0.00 | NR6      | -016 | 0.00 | MCE1    | -014 | 0.00 | CASC20    | -190 | 0.00 | CSC21  | -190 | 0.00 | GCAT    | -159 | 0.00 |
| 11347 F89L16  | -029 | 0.00 | DMO     | -064 | 0.00 | ZNF703    | 047  | 0.00 | TMEM127    | -044 | 0.00 | HELI1    | 068  | 0.00 | NR6      | -016 | 0.00 | MCE1    | -014 | 0.00 | CASC20    | -190 | 0.00 | CSC21  | -190 | 0.00 | GCAT    | -159 | 0.00 |
| 11348 F89L17  | -029 | 0.00 | DMO     | -064 | 0.00 | ZNF703    | 047  | 0.00 | TMEM127    | -044 | 0.00 | HELI1    | 068  | 0.00 | NR6      | -016 | 0.00 | MCE1    | -014 | 0.00 | CASC20    | -190 | 0.00 | CSC21  | -190 | 0.00 | GCAT    | -159 | 0.00 |
| 11349 F89L18  | -029 | 0.00 | DMO     | -064 | 0.00 | ZNF703    | 047  | 0.00 | TMEM127    | -044 | 0.00 | HELI1    | 068  | 0.00 | NR6      | -016 | 0.00 | MCE1    | -014 | 0.00 | CASC20    | -190 | 0.00 | CSC21  | -190 | 0.00 | GCAT    | -159 | 0.00 |
| 11350 F89L19  | -029 | 0.00 | DMO     | -064 | 0.00 | ZNF703    | 047  | 0.00 | TMEM127    | -044 | 0.00 | HELI1    | 068  | 0.00 | NR6      | -016 | 0.00 | MCE1    | -014 | 0.00 | CASC20    | -190 | 0.00 | CSC21  | -190 | 0.00 | GCAT    | -159 | 0.00 |
| 11351 F89L20  | -029 | 0.00 | DMO     | -064 | 0.00 | ZNF703    | 047  | 0.00 | TMEM127    | -044 | 0.00 | HELI1    | 068  | 0.00 | NR6      | -016 | 0.00 | MCE1    | -014 | 0.00 | CASC20    | -190 | 0.00 | CSC21  | -190 | 0.00 | GCAT    | -159 | 0.00 |
| 11352 F89L21  | -029 | 0.00 | DMO     | -064 | 0.00 | ZNF703    | 047  | 0.00 | TMEM127    | -044 | 0.00 | HELI1    | 068  | 0.00 | NR6      | -016 | 0.00 | MCE1    | -014 | 0.00 | CASC20    | -190 | 0.00 | CSC21  | -190 | 0.00 | GCAT    | -159 | 0.00 |
| 11353 F89L22  | -029 | 0.00 | DMO     | -0   |      |           |      |      |            |      |      |          |      |      |          |      |      |         |      |      |           |      |      |        |      |      |         |      |      |

Table with multiple columns containing alphanumeric codes and values. The table lists various identifiers such as 1508 HRCB, 1508 HRCB, 1508 HRCB, etc., followed by numerical values and corresponding codes like 0001, 0002, 0003, etc.

Table with 10 columns: Gene ID, Gene Name, Chr, Start, End, Strand, RefSeq, RefSeq ID, RefSeq Description, RefSeq Accession. Contains a comprehensive list of genes and their genomic coordinates across various chromosomes.

Table with 4 columns: Gene ID, Gene Name, and two columns of numerical values. The table lists numerous genes such as 1880 TMEM254, 1881 CDC2, 1882 TRAF6, etc., with associated values.

Supplemental material table with columns for gene names and numerical values. The table is organized into columns of approximately 10-15 genes each, with values ranging from -0.99 to 0.99. The genes listed include various human genes such as C11orf105, GNAK2, ABCB9, CASA, and many others.

Table with 10 columns: Gene ID, Gene Name, RefSeq ID, RefSeq Name, RefSeq Description, RefSeq Accession, RefSeq Date, RefSeq Status, RefSeq Type, RefSeq Category. The table lists numerous genes and their associated identifiers.



|             |      |    |       |      |    |       |      |    |        |      |    |       |      |    |       |      |    |       |      |    |        |      |    |       |      |    |       |      |    |    |
|-------------|------|----|-------|------|----|-------|------|----|--------|------|----|-------|------|----|-------|------|----|-------|------|----|--------|------|----|-------|------|----|-------|------|----|----|
| 12475 AVEH  | -105 | 00 | ZC9H  | -032 | 00 | MFA3  | -094 | 00 | WDC1   | -338 | 00 | YFC2B | 292  | 00 | MIK2  | -098 | 00 | MMP17 | -089 | 00 | RAVW   | -081 | 04 | FAD2  | -153 | 00 | FOA1M | -239 | 00 | 02 |
| 12476 KZM4  | -127 | 00 | VCM3  | -187 | 00 | CFY4  | -074 | 00 | WDC2   | 209  | 00 | ANW2B | 321  | 00 | MIK3  | -037 | 00 | WDC3  | -122 | 00 | WDC4   | -138 | 04 | WDC5  | -029 | 00 | SC3M4 | -334 | 00 | 02 |
| 12477 A2A   | -105 | 00 | ATP3A | -126 | 00 | FNZ3  | -415 | 00 | TME213 | 330  | 00 | URC2  | 392  | 00 | CXK1  | -023 | 00 | CAP15 | -184 | 00 | AD2M17 | -189 | 04 | SHG8  | -442 | 00 | PPN2C | -043 | 00 | 02 |
| 12478 WZKAP | -055 | 00 | AM3   | -034 | 00 | Q6    | -016 | 00 | Q6     | 014  | 00 | URC3  | 388  | 00 | URC4  | -016 | 00 | URC5  | -184 | 00 | URC6   | -184 | 00 | URC7  | -184 | 00 | URC8  | -184 | 00 | 02 |
| 12479 TME9  | -168 | 00 | GC2   | -022 | 00 | SHZ9  | -079 | 00 | BKA    | -030 | 00 | TAN2C | -032 | 00 | URC9  | -023 | 00 | CIS2  | -037 | 00 | ZPW74  | -135 | 04 | SHG18 | -515 | 00 | AWCA  | -171 | 00 | 02 |
| 12480 WZKAP | -055 | 00 | AM3   | -034 | 00 | Q6    | -016 | 00 | Q6     | 014  | 00 | URC3  | 388  | 00 | URC4  | -016 | 00 | URC5  | -184 | 00 | URC6   | -184 | 00 | URC7  | -184 | 00 | URC8  | -184 | 00 | 02 |
| 12481 MFC2  | -128 | 00 | UP    | -414 | 00 | HAK3A | -104 | 00 | TAF3A  | -278 | 00 | URF4  | 459  | 00 | URF5  | -035 | 00 | URF6  | -035 | 00 | URF7   | -035 | 00 | URF8  | -035 | 00 | URF9  | -035 | 00 | 02 |
| 12482 S2R18 | -112 | 00 | URF10 | -035 | 00 | URF11 | -035 | 00 | URF12  | -035 | 00 | URF13 | -035 | 00 | URF14 | -035 | 00 | URF15 | -035 | 00 | URF16  | -035 | 00 | URF17 | -035 | 00 | URF18 | -035 | 00 | 02 |
| 12483 M72   | -105 | 00 | NT56  | -005 | 00 | CH4L  | -078 | 00 | CH4D   | -030 | 00 | URF4  | 459  | 00 | URF5  | -035 | 00 | URF6  | -035 | 00 | URF7   | -035 | 00 | URF8  | -035 | 00 | URF9  | -035 | 00 | 02 |
| 12484 S2R18 | -112 | 00 | URF10 | -035 | 00 | URF11 | -035 | 00 | URF12  | -035 | 00 | URF13 | -035 | 00 | URF14 | -035 | 00 | URF15 | -035 | 00 | URF16  | -035 | 00 | URF17 | -035 | 00 | URF18 | -035 | 00 | 02 |
| 12485 SC3M4 | -083 | 00 | APM1  | -015 | 00 | TMC2  | -403 | 00 | DAR2   | -030 | 00 | URF4  | 459  | 00 | URF5  | -035 | 00 | URF6  | -035 | 00 | URF7   | -035 | 00 | URF8  | -035 | 00 | URF9  | -035 | 00 | 02 |
| 12486 S2R18 | -112 | 00 | URF10 | -035 | 00 | URF11 | -035 | 00 | URF12  | -035 | 00 | URF13 | -035 | 00 | URF14 | -035 | 00 | URF15 | -035 | 00 | URF16  | -035 | 00 | URF17 | -035 | 00 | URF18 | -035 | 00 | 02 |
| 12487 S2R18 | -112 | 00 | URF10 | -035 | 00 | URF11 | -035 | 00 | URF12  | -035 | 00 | URF13 | -035 | 00 | URF14 | -035 | 00 | URF15 | -035 | 00 | URF16  | -035 | 00 | URF17 | -035 | 00 | URF18 | -035 | 00 | 02 |
| 12488 S2R18 | -112 | 00 | URF10 | -035 | 00 | URF11 | -035 | 00 | URF12  | -035 | 00 | URF13 | -035 | 00 | URF14 | -035 | 00 | URF15 | -035 | 00 | URF16  | -035 | 00 | URF17 | -035 | 00 | URF18 | -035 | 00 | 02 |
| 12489 S2R18 | -112 | 00 | URF10 | -035 | 00 | URF11 | -035 | 00 | URF12  | -035 | 00 | URF13 | -035 | 00 | URF14 | -035 | 00 | URF15 | -035 | 00 | URF16  | -035 | 00 | URF17 | -035 | 00 | URF18 | -035 | 00 | 02 |
| 12490 S2R18 | -112 | 00 | URF10 | -035 | 00 | URF11 | -035 | 00 | URF12  | -035 | 00 | URF13 | -035 | 00 | URF14 | -035 | 00 | URF15 | -035 | 00 | URF16  | -035 | 00 | URF17 | -035 | 00 | URF18 | -035 | 00 | 02 |
| 12491 MPM2  | -259 | 00 | PAR70 | -039 | 00 | C1K2  | -068 | 00 | URF19  | -035 | 00 | URF20 | -035 | 00 | URF21 | -035 | 00 | URF22 | -035 | 00 | URF23  | -035 | 00 | URF24 | -035 | 00 | URF25 | -035 | 00 | 02 |
| 12492 MPM2  | -259 | 00 | PAR70 | -039 | 00 | C1K2  | -068 | 00 | URF19  | -035 | 00 | URF20 | -035 | 00 | URF21 | -035 | 00 | URF22 | -035 | 00 | URF23  | -035 | 00 | URF24 | -035 | 00 | URF25 | -035 | 00 | 02 |
| 12493 MPM2  | -259 | 00 | PAR70 | -039 | 00 | C1K2  | -068 | 00 | URF19  | -035 | 00 | URF20 | -035 | 00 | URF21 | -035 | 00 | URF22 | -035 | 00 | URF23  | -035 | 00 | URF24 | -035 | 00 | URF25 | -035 | 00 | 02 |
| 12494 MPM2  | -259 | 00 | PAR70 | -039 | 00 | C1K2  | -068 | 00 | URF19  | -035 | 00 | URF20 | -035 | 00 | URF21 | -035 | 00 | URF22 | -035 | 00 | URF23  | -035 | 00 | URF24 | -035 | 00 | URF25 | -035 | 00 | 02 |
| 12495 C2K2B | -022 | 00 | C1K2  | -032 | 00 | YOC   | -017 | 00 | COCA   | -057 | 00 | URF19 | -035 | 00 | URF20 | -035 | 00 | URF21 | -035 | 00 | URF22  | -035 | 00 | URF23 | -035 | 00 | URF24 | -035 | 00 | 02 |
| 12496 MFC2  | -128 | 00 | UP    | -414 | 00 | HAK3A | -104 | 00 | TAF3A  | -278 | 00 | URF4  | 459  | 00 | URF5  | -035 | 00 | URF6  | -035 | 00 | URF7   | -035 | 00 | URF8  | -035 | 00 | URF9  | -035 | 00 | 02 |
| 12497 S2R18 | -112 | 00 | URF10 | -035 | 00 | URF11 | -035 | 00 | URF12  | -035 | 00 | URF13 | -035 | 00 | URF14 | -035 | 00 | URF15 | -035 | 00 | URF16  | -035 | 00 | URF17 | -035 | 00 | URF18 | -035 | 00 | 02 |
| 12498 M72   | -105 | 00 | NT56  | -005 | 00 | CH4L  | -078 | 00 | CH4D   | -030 | 00 | URF4  | 459  | 00 | URF5  | -035 | 00 | URF6  | -035 | 00 | URF7   | -035 | 00 | URF8  | -035 | 00 | URF9  | -035 | 00 | 02 |
| 12499 S2R18 | -112 | 00 | URF10 | -035 | 00 | URF11 | -035 | 00 | URF12  | -035 | 00 | URF13 | -035 | 00 | URF14 | -035 | 00 | URF15 | -035 | 00 | URF16  | -035 | 00 | URF17 | -035 | 00 | URF18 | -035 | 00 | 02 |
| 12500 S2R18 | -112 | 00 | URF10 | -035 | 00 | URF11 | -035 | 00 | URF12  | -035 | 00 | URF13 | -035 | 00 | URF14 | -035 | 00 | URF15 | -035 | 00 | URF16  | -035 | 00 | URF17 | -035 | 00 | URF18 | -035 | 00 | 02 |
| 12501 S2R18 | -112 | 00 | URF10 | -035 | 00 | URF11 | -035 | 00 | URF12  | -035 | 00 | URF13 | -035 | 00 | URF14 | -035 | 00 | URF15 | -035 | 00 | URF16  | -035 | 00 | URF17 | -035 | 00 | URF18 | -035 | 00 | 02 |
| 12502 S2R18 | -112 | 00 | URF10 | -035 | 00 | URF11 | -035 | 00 | URF12  | -035 | 00 | URF13 | -035 | 00 | URF14 | -035 | 00 | URF15 | -035 | 00 | URF16  | -035 | 00 | URF17 | -035 | 00 | URF18 | -035 | 00 | 02 |
| 12503 S2R18 | -112 | 00 | URF10 | -035 | 00 | URF11 | -035 | 00 | URF12  | -035 | 00 | URF13 | -035 | 00 | URF14 | -035 | 00 | URF15 | -035 | 00 | URF16  | -035 | 00 | URF17 | -035 | 00 | URF18 | -035 | 00 | 02 |
| 12504 S2R18 | -112 | 00 | URF10 | -035 | 00 | URF11 | -035 | 00 | URF12  | -035 | 00 | URF13 | -035 | 00 | URF14 | -035 | 00 | URF15 | -035 | 00 | URF16  | -035 | 00 | URF17 | -035 | 00 | URF18 | -035 | 00 | 02 |
| 12505 S2R18 | -112 | 00 | URF10 | -035 | 00 | URF11 | -035 | 00 | URF12  | -035 | 00 | URF13 | -035 | 00 | URF14 | -035 | 00 | URF15 | -035 | 00 | URF16  | -035 | 00 | URF17 | -035 | 00 | URF18 | -035 | 00 | 02 |
| 12506 S2R18 | -112 | 00 | URF10 | -035 | 00 | URF11 | -035 | 00 | URF12  | -035 | 00 | URF13 | -035 | 00 | URF14 | -035 | 00 | URF15 | -035 | 00 | URF16  | -035 | 00 | URF17 | -035 | 00 | URF18 | -035 | 00 | 02 |
| 12507 S2R18 | -112 | 00 | URF10 | -035 | 00 | URF11 | -035 | 00 | URF12  | -035 | 00 | URF13 | -035 | 00 | URF14 | -035 | 00 | URF15 | -035 | 00 | URF16  | -035 | 00 | URF17 | -035 | 00 | URF18 | -035 | 00 | 02 |
| 12508 S2R18 | -112 | 00 | URF10 | -035 | 00 | URF11 | -035 | 00 | URF12  | -035 | 00 | URF13 | -035 | 00 | URF14 | -035 | 00 | URF15 | -035 | 00 | URF16  | -035 | 00 | URF17 | -035 | 00 | URF18 | -035 | 00 | 02 |
| 12509 S2R18 | -112 | 00 | URF10 | -035 | 00 | URF11 | -035 | 00 | URF12  | -035 | 00 | URF13 | -035 | 00 | URF14 | -035 | 00 | URF15 | -035 | 00 | URF16  | -035 | 00 | URF17 | -035 | 00 | URF18 | -035 | 00 | 02 |
| 12510 S2R18 | -112 | 00 | URF10 | -035 | 00 | URF11 | -035 | 00 | URF12  | -035 | 00 | URF13 | -035 | 00 | URF14 | -035 | 00 | URF15 | -035 | 00 | URF16  | -035 | 00 | URF17 | -035 | 00 | URF18 | -035 | 00 | 02 |
| 12511 S2R18 | -112 | 00 | URF10 | -035 | 00 | URF11 | -035 | 00 | URF12  | -035 | 00 | URF13 | -035 | 00 | URF14 | -035 | 00 | URF15 | -035 | 00 | URF16  | -035 | 00 | URF17 | -035 | 00 | URF18 | -035 | 00 | 02 |
| 12512 S2R18 | -112 | 00 | URF10 | -035 | 00 | URF11 | -035 | 00 | URF12  | -035 | 00 | URF13 | -035 | 00 | URF14 | -035 | 00 | URF15 | -035 | 00 | URF16  | -035 | 00 | URF17 | -035 | 00 | URF18 | -035 | 00 | 02 |
| 12513 S2R18 | -112 | 00 | URF10 | -035 | 00 | URF11 | -035 | 00 | URF12  | -035 | 00 | URF13 | -035 | 00 | URF14 | -035 | 00 | URF15 | -035 | 00 | URF16  | -035 | 00 | URF17 | -035 | 00 | URF18 | -035 | 00 | 02 |
| 12514 S2R18 | -112 | 00 | URF10 | -035 | 00 | URF11 | -035 | 00 | URF12  | -035 | 00 | URF13 | -035 | 00 | URF14 | -035 | 00 | URF15 | -035 | 00 | URF16  | -035 | 00 | URF17 | -035 | 00 | URF18 | -035 | 00 | 02 |
| 12515 S2R18 | -112 | 00 | URF10 | -035 | 00 | URF11 | -035 | 00 | URF12  | -035 | 00 | URF13 | -035 | 00 | URF14 | -035 | 00 | URF15 | -035 | 00 | URF16  | -035 | 00 | URF17 | -035 | 00 | URF18 | -035 | 00 | 02 |
| 12516 S2R18 | -112 | 00 | URF10 | -035 | 00 | URF11 | -035 | 00 | URF12  | -035 | 00 | URF13 | -035 | 00 | URF14 | -035 | 00 | URF15 | -035 | 00 | URF16  | -035 | 00 | URF17 | -035 | 00 | URF18 | -035 | 00 | 02 |
| 12517 S2R18 | -112 | 00 | URF10 | -035 | 00 | URF11 | -035 | 00 | URF12  | -035 | 00 | URF13 | -035 | 00 | URF14 | -035 | 00 | URF15 | -035 | 00 | URF16  | -035 | 00 | URF17 | -035 | 00 | URF18 | -035 | 00 | 02 |
| 12518 S2R18 | -112 | 00 | URF10 | -035 | 00 | URF11 | -035 | 00 | URF12  | -035 | 00 | URF13 | -035 | 00 | URF14 | -035 | 00 | URF15 | -035 | 00 | URF16  | -035 | 00 | URF17 | -035 | 00 | URF18 | -035 | 00 | 02 |
| 12519 S2R18 | -112 | 00 | URF10 | -035 | 00 | URF11 | -035 | 00 | URF12  | -035 | 00 | URF13 | -035 | 00 | URF14 | -035 | 00 | URF15 | -035 | 00 | URF16  | -035 | 00 | URF17 | -035 | 00 | URF18 | -035 | 00 | 02 |
| 12520 S2R18 | -112 | 00 | URF10 | -035 | 00 | URF11 | -035 | 00 | URF12  | -035 | 00 | URF13 | -035 | 00 | URF14 | -035 | 00 | URF15 | -035 | 00 | URF16  | -035 | 00 | URF17 | -035 | 00 | URF18 | -035 | 00 | 02 |
| 12521 S2R18 | -112 | 00 | URF10 | -035 | 00 | URF11 | -035 | 00 | URF12  | -035 | 00 | URF13 | -035 | 00 | URF14 | -035 | 00 | URF15 | -035 | 00 | URF16  | -035 | 00 | URF17 | -035 | 00 | URF18 | -035 | 00 | 02 |
| 12522 S2R18 | -112 | 00 | URF10 | -035 | 00 | URF11 | -035 | 00 | URF12  | -035 | 00 | URF13 | -035 | 00 | URF14 | -035 | 00 | URF15 | -035 | 00 | URF16  | -035 | 00 | URF17 | -035 | 00 | URF18 | -035 | 00 | 02 |
| 12523 S2R18 | -112 | 00 | URF10 | -035 |    |       |      |    |        |      |    |       |      |    |       |      |    |       |      |    |        |      |    |       |      |    |       |      |    |    |



|              |       |      |        |       |      |        |       |      |         |       |      |         |       |      |         |       |      |         |       |      |         |       |      |         |       |      |         |       |      |
|--------------|-------|------|--------|-------|------|--------|-------|------|---------|-------|------|---------|-------|------|---------|-------|------|---------|-------|------|---------|-------|------|---------|-------|------|---------|-------|------|
| 18865 TSK1   | -129  | 0.00 | STW2   | -0.34 | 0.00 | EXV2   | -0.66 | 0.00 | ZICW4A  | -0.21 | 0.00 | CHN1    | 2.45  | 0.00 | CELC4C  | -4.96 | 0.00 | SICL3A1 | -0.43 | 0.00 | GTRHC6  | -0.64 | 0.00 | SCS1    | -0.19 | 0.00 | DDDKX   | 0.11  | 0.00 |
| 18866 CDT2   | -0.39 | 0.00 | DPW2   | 0.11  | 0.00 | CSB1E1 | 2.18  | 0.00 | CHN2    | 0.29  | 0.00 | CHN1    | -0.29 | 0.00 | CELC4C  | -4.96 | 0.00 | AMK2    | -2.43 | 0.00 | PCCD3C  | -1.93 | 0.00 | FCR2B   | -1.35 | 0.00 | NAPY1E  | -0.04 | 0.00 |
| 18867 TFM    | -0.00 | 0.00 | URCS3  | -0.00 | 0.00 | KPFC   | -0.01 | 0.00 | ZYK     | 0.07  | 0.00 | GL1     | 4.93  | 0.00 | NW02    | -1.46 | 0.00 | BRM12   | -0.46 | 0.00 | COZ     | -2.47 | 0.00 | WNV7B   | -5.51 | 0.00 | NAPY1E  | -0.04 | 0.00 |
| 18868 AMM1   | -0.02 | 0.00 | AMM1   | -0.02 | 0.00 | AMM1   | -0.02 | 0.00 | AMM1    | -0.02 | 0.00 | AMM1    | -0.02 | 0.00 | AMM1    | -0.02 | 0.00 | AMM1    | -0.02 | 0.00 | AMM1    | -0.02 | 0.00 | AMM1    | -0.02 | 0.00 | AMM1    | -0.02 | 0.00 |
| 18869 GMP    | -1.15 | 0.00 | EXT1   | -1.32 | 0.00 | EXT1   | -1.07 | 0.00 | ASC2    | 0.07  | 0.00 | CHN1    | 3.41  | 0.00 | CHN1    | -0.47 | 0.00 | NK42H   | -0.58 | 0.00 | STABDAS | -1.47 | 0.00 | MP      | -4.80 | 0.00 | 4-SEP   | 0.30  | 0.00 |
| 18870 MTA1   | -0.22 | 0.00 | MTA1   | -0.22 | 0.00 | MTA1   | -0.22 | 0.00 | MTA1    | -0.22 | 0.00 | MTA1    | -0.22 | 0.00 | MTA1    | -0.22 | 0.00 | MTA1    | -0.22 | 0.00 | MTA1    | -0.22 | 0.00 | MTA1    | -0.22 | 0.00 | MTA1    | -0.22 | 0.00 |
| 18871 C0C71  | -0.82 | 0.00 | MU1    | -1.22 | 0.00 | DK4P   | -0.05 | 0.00 | FAM15A  | 0.07  | 0.00 | CHN2    | 1.89  | 0.00 | CHN2    | -1.90 | 0.00 | CASK    | -1.96 | 0.00 | AR3     | -1.17 | 0.00 | SEPH1   | -0.40 | 0.00 | PPM1A   | 0.13  | 0.00 |
| 18872 TFC1   | -0.65 | 0.00 | KANP9  | -0.65 | 0.00 | KANP9  | -0.65 | 0.00 | KANP9   | -0.65 | 0.00 | KANP9   | -0.65 | 0.00 | KANP9   | -0.65 | 0.00 | KANP9   | -0.65 | 0.00 | KANP9   | -0.65 | 0.00 | KANP9   | -0.65 | 0.00 | KANP9   | -0.65 | 0.00 |
| 18873 M03    | -0.00 | 0.00 | KCL2   | -0.00 | 0.00 | MTR    | -0.54 | 0.00 | OSPBL2  | 0.24  | 0.00 | LY1     | 1.17  | 0.00 | ORP2    | -0.48 | 0.00 |
| 18874 M03    | -0.17 | 0.00 | SMK91  | -1.83 | 0.00 | SCAMP1 | 0.21  | 0.00 | UNC0403 | -0.22 | 0.00 |
| 18875 F0A2   | -1.17 | 0.00 | BAGC1  | -1.17 | 0.00 | BAGC1  | -1.17 | 0.00 | BAGC1   | -1.17 | 0.00 | BAGC1   | -1.17 | 0.00 | BAGC1   | -1.17 | 0.00 | BAGC1   | -1.17 | 0.00 | BAGC1   | -1.17 | 0.00 | BAGC1   | -1.17 | 0.00 | BAGC1   | -1.17 | 0.00 |
| 18876 F0A2   | -1.17 | 0.00 | BAGC1  | -1.17 | 0.00 | BAGC1  | -1.17 | 0.00 | BAGC1   | -1.17 | 0.00 | BAGC1   | -1.17 | 0.00 | BAGC1   | -1.17 | 0.00 | BAGC1   | -1.17 | 0.00 | BAGC1   | -1.17 | 0.00 | BAGC1   | -1.17 | 0.00 | BAGC1   | -1.17 | 0.00 |
| 18877 F0A2   | -1.17 | 0.00 | BAGC1  | -1.17 | 0.00 | BAGC1  | -1.17 | 0.00 | BAGC1   | -1.17 | 0.00 | BAGC1   | -1.17 | 0.00 | BAGC1   | -1.17 | 0.00 | BAGC1   | -1.17 | 0.00 | BAGC1   | -1.17 | 0.00 | BAGC1   | -1.17 | 0.00 | BAGC1   | -1.17 | 0.00 |
| 18878 F0A2   | -1.17 | 0.00 | BAGC1  | -1.17 | 0.00 | BAGC1  | -1.17 | 0.00 | BAGC1   | -1.17 | 0.00 | BAGC1   | -1.17 | 0.00 | BAGC1   | -1.17 | 0.00 | BAGC1   | -1.17 | 0.00 | BAGC1   | -1.17 | 0.00 | BAGC1   | -1.17 | 0.00 | BAGC1   | -1.17 | 0.00 |
| 18879 F0A2   | -1.17 | 0.00 | BAGC1  | -1.17 | 0.00 | BAGC1  | -1.17 | 0.00 | BAGC1   | -1.17 | 0.00 | BAGC1   | -1.17 | 0.00 | BAGC1   | -1.17 | 0.00 | BAGC1   | -1.17 | 0.00 | BAGC1   | -1.17 | 0.00 | BAGC1   | -1.17 | 0.00 | BAGC1   | -1.17 | 0.00 |
| 18880 C0C71  | -0.82 | 0.00 | MU1    | -1.22 | 0.00 | DK4P   | -0.05 | 0.00 | FAM15A  | 0.07  | 0.00 | CHN2    | 1.89  | 0.00 | CHN2    | -1.90 | 0.00 | CASK    | -1.96 | 0.00 | AR3     | -1.17 | 0.00 | SEPH1   | -0.40 | 0.00 | PPM1A   | 0.13  | 0.00 |
| 18881 S1A    | -4.82 | 0.00 | AKC2C  | -1.92 | 0.00 | IKB3   | -1.21 | 0.00 | TNKS27  | 0.04  | 0.00 | FAH68B  | 0.87  | 0.00 | FAH68B  | -0.42 | 0.00 |
| 18882 M02    | -0.25 | 0.00 | UNC13B | -4.13 | 0.00 | FKBP1B | -0.24 | 0.00 | SIC29A4 | -3.11 | 0.00 | STABDAS | -1.47 | 0.00 | MP      | -4.80 | 0.00 |
| 18883 S4     | -1.65 | 0.00 | UTFC4B | -1.95 | 0.00 | WNA1   | -2.18 | 0.00 | SHO2A   | -1.05 | 0.00 | GRE1    | 1.25  | 0.00 | GRE1    | -0.25 | 0.00 |
| 18884 S4     | -1.65 | 0.00 | UTFC4B | -1.95 | 0.00 | WNA1   | -2.18 | 0.00 | SHO2A   | -1.05 | 0.00 | GRE1    | 1.25  | 0.00 | GRE1    | -0.25 | 0.00 |
| 18885 S4     | -1.65 | 0.00 | UTFC4B | -1.95 | 0.00 | WNA1   | -2.18 | 0.00 | SHO2A   | -1.05 | 0.00 | GRE1    | 1.25  | 0.00 | GRE1    | -0.25 | 0.00 |
| 18886 S4     | -1.65 | 0.00 | UTFC4B | -1.95 | 0.00 | WNA1   | -2.18 | 0.00 | SHO2A   | -1.05 | 0.00 | GRE1    | 1.25  | 0.00 | GRE1    | -0.25 | 0.00 |
| 18887 FAM138 | -0.54 | 0.00 | GGP1   | 0.03  | 0.00 | CDNR   | -0.61 | 0.00 | ABC2    | -1.87 | 0.00 | KCNC2   | 2.02  | 0.00 | KCNC2   | -0.18 | 0.00 |
| 18888 M02    | -1.14 | 0.00 | SAPY1  | -0.96 | 0.00 | GLCE   | -0.83 | 0.00 | CDK3    | -0.51 | 0.00 | KCNC1   | 4.61  | 0.00 | KCNC1   | -0.23 | 0.00 |
| 18889 M02    | -1.14 | 0.00 | SAPY1  | -0.96 | 0.00 | GLCE   | -0.83 | 0.00 | CDK3    | -0.51 | 0.00 | KCNC1   | 4.61  | 0.00 | KCNC1   | -0.23 | 0.00 |
| 18890 M02    | -1.14 | 0.00 | SAPY1  | -0.96 | 0.00 | GLCE   | -0.83 | 0.00 | CDK3    | -0.51 | 0.00 | KCNC1   | 4.61  | 0.00 | KCNC1   | -0.23 | 0.00 |
| 18891 M02    | -1.14 | 0.00 | SAPY1  | -0.96 | 0.00 | GLCE   | -0.83 | 0.00 | CDK3    | -0.51 | 0.00 | KCNC1   | 4.61  | 0.00 | KCNC1   | -0.23 | 0.00 |
| 18892 SCLG4  | -0.74 | 0.00 | MTA1   | -0.49 | 0.00 | CDK3   | -0.48 | 0.00 | MPD1D   | -0.14 | 0.00 | PRB2    | 3.74  | 0.00 | PRB2    | -0.99 | 0.00 |
| 18893 M02    | -1.01 | 0.00 | CHK3   | -0.33 | 0.00 | WNT7B  | -4.43 | 0.00 | MSG4B   | -0.80 | 0.00 | SHO2    | 2.75  | 0.00 | SHO2    | -0.23 | 0.00 |
| 18894 M02    | -1.01 | 0.00 | CHK3   | -0.33 | 0.00 | WNT7B  | -4.43 | 0.00 | MSG4B   | -0.80 | 0.00 | SHO2    | 2.75  | 0.00 | SHO2    | -0.23 | 0.00 |
| 18895 M02    | -1.01 | 0.00 | CHK3   | -0.33 | 0.00 | WNT7B  | -4.43 | 0.00 | MSG4B   | -0.80 | 0.00 | SHO2    | 2.75  | 0.00 | SHO2    | -0.23 | 0.00 |
| 18896 M02    | -1.01 | 0.00 | CHK3   | -0.33 | 0.00 | WNT7B  | -4.43 | 0.00 | MSG4B   | -0.80 | 0.00 | SHO2    | 2.75  | 0.00 | SHO2    | -0.23 | 0.00 |
| 18897 FAM138 | -0.54 | 0.00 | GGP1   | 0.03  | 0.00 | CDNR   | -0.61 | 0.00 | ABC2    | -1.87 | 0.00 | KCNC2   | 2.02  | 0.00 | KCNC2   | -0.18 | 0.00 |
| 18898 FAM138 | -0.54 | 0.00 | GGP1   | 0.03  | 0.00 | CDNR   | -0.61 | 0.00 | ABC2    | -1.87 | 0.00 | KCNC2   | 2.02  | 0.00 | KCNC2   | -0.18 | 0.00 |
| 18899 FAM138 | -0.54 | 0.00 | GGP1   | 0.03  | 0.00 | CDNR   | -0.61 | 0.00 | ABC2    | -1.87 | 0.00 | KCNC2   | 2.02  | 0.00 | KCNC2   | -0.18 | 0.00 |
| 18900 FAM138 | -0.54 | 0.00 | GGP1   | 0.03  | 0.00 | CDNR   | -0.61 | 0.00 | ABC2    | -1.87 | 0.00 | KCNC2   | 2.02  | 0.00 | KCNC2   | -0.18 | 0.00 |
| 18901 FAM138 | -0.54 | 0.00 | GGP1   | 0.03  | 0.00 | CDNR   | -0.61 | 0.00 | ABC2    | -1.87 | 0.00 | KCNC2   | 2.02  | 0.00 | KCNC2   | -0.18 | 0.00 |
| 18902 FAM138 | -0.54 | 0.00 | GGP1   | 0.03  | 0.00 | CDNR   | -0.61 | 0.00 | ABC2    | -1.87 | 0.00 | KCNC2   | 2.02  | 0.00 | KCNC2   | -0.18 | 0.00 |
| 18903 FAM138 | -0.54 | 0.00 | GGP1   | 0.03  | 0.00 | CDNR   | -0.61 | 0.00 | ABC2    | -1.87 | 0.00 | KCNC2   | 2.02  | 0.00 | KCNC2   | -0.18 | 0.00 |
| 18904 FAM138 | -0.54 | 0.00 | GGP1   | 0.03  | 0.00 | CDNR   | -0.61 | 0.00 | ABC2    | -1.87 | 0.00 | KCNC2   | 2.02  | 0.00 | KCNC2   | -0.18 | 0.00 |
| 18905 FAM138 | -0.54 | 0.00 | GGP1   | 0.03  | 0.00 | CDNR   | -0.61 | 0.00 | ABC2    | -1.87 | 0.00 | KCNC2   | 2.02  | 0.00 | KCNC2   | -0.18 | 0.00 |
| 18906 FAM138 | -0.54 | 0.00 | GGP1   | 0.03  | 0.00 | CDNR   | -0.61 | 0.00 | ABC2    | -1.87 | 0.00 | KCNC2   | 2.02  | 0.00 | KCNC2   | -0.18 | 0.00 |
| 18907 FAM138 | -0.54 | 0.00 | GGP1   | 0.03  | 0.00 | CDNR   | -0.61 | 0.00 | ABC2    | -1.87 | 0.00 | KCNC2   | 2.02  | 0.00 | KCNC2   | -0.18 | 0.00 |
| 18908 FAM138 | -0.54 | 0.00 | GGP1   | 0.03  | 0.00 | CDNR   | -0.61 | 0.00 | ABC2    | -1.87 | 0.00 | KCNC2   | 2.02  | 0.00 | KCNC2   | -0.18 | 0.00 |
| 18909 FAM138 | -0.54 | 0.00 | GGP1   | 0.03  | 0.00 | CDNR   | -0.61 | 0.00 | ABC2    | -1.87 | 0.00 | KCNC2   | 2.02  | 0.00 | KCNC2   | -0.18 | 0.00 |
| 18910 FAM138 | -0.54 | 0.00 | GGP1   | 0.03  | 0.00 | CDNR   | -0.61 | 0.00 | ABC2    | -1.87 | 0.00 | KCNC2   |       |      |         |       |      |         |       |      |         |       |      |         |       |      |         |       |      |

Table with 3 columns: Gene ID, Gene Name, and Value. The table lists numerous genes such as 13060 TMEM34, 13061 RPL10, 13062 RPL10A, etc., with associated numerical values ranging from -0.18 to 0.24.











Table with 10 columns: Gene ID, Gene Name, Chr, Start, End, Strand, RefSeq, Ensembl, UniProt, and other identifiers. The table lists numerous genes and their genomic coordinates across various chromosomes.









Table with 4 columns: ID, X, Y, Z. Contains a dense grid of numerical data points for various identifiers.



Table with 4 columns: ID, Name, Value, and another Name. The table lists numerous identifiers and their corresponding values, organized in a grid-like structure.



Table with 3 columns: Gene ID, Gene Name, and Correlation Coefficient. The table lists numerous genes such as 15696 TGF1, 15698 TRAF2, 15699 TRAF3, etc., with their respective correlation values.



Table with 100 columns of numerical data representing genomic coordinates and values. The data is organized in a grid-like structure with 100 columns and approximately 1000 rows of data points.



Table with 100 columns of gene names and their corresponding expression values. The table lists various genes such as 16379 SHAR29, 16379 TRAK, 16379 TRAF1, etc., with values ranging from -1.31 to 0.34.

Table with 10 columns of gene names and numerical values. The table lists various genes such as 16070 CROCC1, 16071 EDC1, 16072 RAB18, etc., with corresponding values in each column.

Table with 3 columns: Gene symbol, Gene name, and Value. The table lists numerous genes such as 17K11, 17K12, 17K13, etc., with their corresponding values ranging from -1.16 to 4.20.

Table with 4 columns: Gene ID, Gene Name, Gene Symbol, and Value. The table lists numerous genes such as 19600 TMEM48B, 19601 BMTF, 19602 TMEM160, etc., with associated numerical values.





Table with 10 columns of gene names and numerical values. The table lists various genes such as 1700 DCORL1, 1701 PTPN11, 1702 SLC6A1, etc., with associated numerical values ranging from -130 to 204.

Table with 10 columns of gene symbols and numerical values. The table lists various genes such as 1764 CD47, 1764 CD48, 1764 CD49, etc., with associated numerical values ranging from -0.88 to 0.46.

Table with 4 columns: Gene symbol, Gene name, Chromosome, and Position. The table lists numerous genes such as 17161 C6orf2, 17162 C6orf3, 17163 C6orf4, etc., with their corresponding genomic coordinates.



|                |      |      |          |      |      |          |      |      |         |      |      |         |      |      |          |      |      |          |      |      |        |      |      |         |      |      |         |      |      |
|----------------|------|------|----------|------|------|----------|------|------|---------|------|------|---------|------|------|----------|------|------|----------|------|------|--------|------|------|---------|------|------|---------|------|------|
| 18130 GPXA     | -142 | 0.00 | C37B     | -157 | 0.00 | HSPHRI1  | -138 | 0.00 | GARG    | -295 | 0.00 | EVL     | -334 | 0.00 | EY2B     | -455 | 0.00 | CTSC     | -260 | 0.00 | RP35A  | -639 | 0.00 | SERPNA1 | -288 | 0.00 | CD3151  | -200 | 0.00 |
| 18131 M2FA     | -243 | 0.00 | T0N      | -137 | 0.00 | AT0D     | -189 | 0.00 | BP51    | -679 | 0.00 | EY2B    | -508 | 0.00 | T0M3     | -145 | 0.00 | RP12     | -178 | 0.00 | RP12   | -165 | 0.00 | PSAP    | -150 | 0.00 | MT-CC2  | -042 | 0.00 |
| 18132 TH0BP    | -322 | 0.00 | S10D0B   | -342 | 0.00 | AF1      | -341 | 0.00 | CTSC    | -219 | 0.00 | PHD5    | -089 | 0.00 | APFC     | -095 | 0.00 | YWHAB    | -108 | 0.00 | RP17A  | -042 | 0.00 | HUA-DQ1 | -260 | 0.00 | NJRP1   | -323 | 0.00 |
| 18133 FL       | -125 | 0.00 | HSP91    | -217 | 0.00 | HSP91    | -166 | 0.00 | KCSE    | -292 | 0.00 | FAU     | -072 | 0.00 | RP12     | -095 | 0.00 | GRF5     | -111 | 0.00 | RP12   | -056 | 0.00 | SYNGR3  | -239 | 0.00 | CC14    | -352 | 0.00 |
| 18134 GLU      | -351 | 0.00 | ATP8V9B  | -187 | 0.00 | KU7A     | -346 | 0.00 | TH0BP   | -293 | 0.00 | RCC2    | -325 | 0.00 | RP12     | -054 | 0.00 | EMIA     | -208 | 0.00 | RP13   | -487 | 0.00 | CD59    | -243 | 0.00 | RAB21   | -487 | 0.00 |
| 18135 WAPR     | -171 | 0.00 | CTSC     | -192 | 0.00 | NJRP1    | -154 | 0.00 | RP12    | -058 | 0.00 | PDOS    | -180 | 0.00 | KCSE     | -340 | 0.00 | RGCB     | -166 | 0.00 | H0PK   | -430 | 0.00 | ILN1    | -137 | 0.00 | RP130   | -396 | 0.00 |
| 18136 HSP91AA1 | -119 | 0.00 | CTSC     | -110 | 0.00 | S10D43   | -317 | 0.00 | CXCA4   | -268 | 0.00 | DYFC    | -535 | 0.00 | C24B     | -456 | 0.00 | SERPNA1  | -299 | 0.00 | RP52   | -035 | 0.00 | PKM1    | -143 | 0.00 | PLAUR   | -340 | 0.00 |
| 18137 LGALS3   | -157 | 0.00 | S10D411  | -121 | 0.00 | CTSC     | -159 | 0.00 | EPH2    | -159 | 0.00 | RGS1    | -444 | 0.00 | CTSC     | -245 | 0.00 | ITGB     | -182 | 0.00 | TM2C   | -482 | 0.00 | CTSC    | -143 | 0.00 | LGALS3  | -144 | 0.00 |
| 18138 CTSC     | -260 | 0.00 | YBC3     | -345 | 0.00 | RAB11    | -482 | 0.00 | C24B    | -383 | 0.00 | EF1A1   | -116 | 0.00 | MT-CC1   | -045 | 0.00 | CYTP     | -187 | 0.00 | RP111  | -055 | 0.00 | CTSC    | -101 | 0.00 | CER9B   | -176 | 0.00 |
| 18139 PDLIM1   | -157 | 0.00 | FC02T    | -293 | 0.00 | CTSC     | -153 | 0.00 | EPH2    | -076 | 0.00 | LP1     | -447 | 0.00 | CTSC     | -061 | 0.00 | BARH52   | -182 | 0.00 | RP139  | -055 | 0.00 | CTSC    | -181 | 0.00 | HSP90B  | -123 | 0.00 |
| 18140 HCS7     | -239 | 0.00 | GSN      | -440 | 0.00 | TMPI1    | -191 | 0.00 | RS1     | -365 | 0.00 | ITGB    | -346 | 0.00 | LP1      | -424 | 0.00 | CL1      | -079 | 0.00 | RP115  | -050 | 0.00 | ANNA2   | -147 | 0.00 | AF1     | -373 | 0.00 |
| 18141 RPA4     | -217 | 0.00 | CTSC     | -296 | 0.00 | GLU      | -203 | 0.00 | E2F1    | -238 | 0.00 | CBAR    | -624 | 0.00 | HUA-A    | -089 | 0.00 | RP123    | -209 | 0.00 | RP52   | -058 | 0.00 | HSP90B  | -225 | 0.00 | RPA4    | -127 | 0.00 |
| 18142 SERPNA1  | -149 | 0.00 | SERPNA1  | -337 | 0.00 | LGALS3BP | -303 | 0.00 | UBA52   | -064 | 0.00 | DP192A2 | -223 | 0.00 | TH0BP    | -383 | 0.00 | RP138    | -051 | 0.00 | RP52   | -065 | 0.00 | S10D4B  | -096 | 0.00 | POU4F1  | -431 | 0.00 |
| 18143 FTH1     | -158 | 0.00 | CTSC     | -230 | 0.00 | ANNA2    | -325 | 0.00 | RP13A   | -076 | 0.00 | CTFL1   | -309 | 0.00 | CTFL1    | -289 | 0.00 | FNAN     | -244 | 0.00 | RP18   | -062 | 0.00 | YBC3    | -375 | 0.00 | CAP5    | -391 | 0.00 |
| 18144 ENO3     | -164 | 0.00 | PTM5     | -295 | 0.00 | CD3151   | -230 | 0.00 | RP12    | -062 | 0.00 | UBA52   | -089 | 0.00 | LRBP1    | -207 | 0.00 | RP128    | -044 | 0.00 | RP14   | -058 | 0.00 | HUA-D8B | -169 | 0.00 | MT-ND3  | -059 | 0.00 |
| 18145 LYR6     | -184 | 0.00 | DIP      | -139 | 0.00 | CTSC     | -176 | 0.00 | RP52B   | -177 | 0.00 | CDIC4   | -400 | 0.00 | CDIC4    | -400 | 0.00 | ALS      | -187 | 0.00 | RP16   | -080 | 0.00 | RCC2    | -227 | 0.00 | FECD4   | -456 | 0.00 |
| 18146 SGN      | -160 | 0.00 | GLU      | -258 | 0.00 | CTSC     | -219 | 0.00 | YWH0B   | -163 | 0.00 | TH0BP   | -454 | 0.00 | CTSC     | -282 | 0.00 | E2F1     | -186 | 0.00 | RP120  | -075 | 0.00 | T0N1    | -151 | 0.00 | CTSH    | -236 | 0.00 |
| 18147 T0N      | -187 | 0.00 | TM2P     | -114 | 0.00 | SYNGR3   | -210 | 0.00 | LP1     | -375 | 0.00 | RAC2    | -401 | 0.00 | ALDO3AP  | -402 | 0.00 | CALM1    | -100 | 0.00 | RP12   | -056 | 0.00 | GRM1    | -152 | 0.00 | RAB13   | -404 | 0.00 |
| 18148 RPTM3    | -127 | 0.00 | HEAT1    | -134 | 0.00 | QSOX1    | -129 | 0.00 | QSOX1   | -095 | 0.00 | RP52B   | -107 | 0.00 | HUA-B    | -196 | 0.00 | CC51     | -811 | 0.00 | RP127A | -054 | 0.00 | FC02T   | -105 | 0.00 | HUA-D9A | -160 | 0.00 |
| 18149 SERP2    | -082 | 0.00 | HUA-DQ4  | -340 | 0.00 | ALDH2    | -364 | 0.00 | RP127A  | -067 | 0.00 | RP12    | -476 | 0.00 | GSMA3    | -400 | 0.00 | COR3D1A  | -223 | 0.00 | RP17   | -071 | 0.00 | CHCHD10 | -124 | 0.00 | S10D4B  | -308 | 0.00 |
| 18150 SIZ2     | -378 | 0.00 | COX      | -315 | 0.00 | RAB13    | -423 | 0.00 | RP5A    | -101 | 0.00 | RP12    | -125 | 0.00 | ARPC3    | -143 | 0.00 | MT-CC3   | -082 | 0.00 | RP12A  | -078 | 0.00 | TMLH1A  | -176 | 0.00 | SERPNA1 | -296 | 0.00 |
| 18151 PPI1     | -122 | 0.00 | ICEG1G   | -364 | 0.00 | FCER1G   | -276 | 0.00 | MT-CC2  | -065 | 0.00 | GRM3    | -447 | 0.00 | QAZ1     | -098 | 0.00 | CTSC     | -209 | 0.00 | RP58   | -049 | 0.00 | P1P1    | -230 | 0.00 | GSN     | -379 | 0.00 |
| 18152 MAT2     | -171 | 0.00 | BR1      | -196 | 0.00 | SERPNA1  | -308 | 0.00 | ALDO3AP | -339 | 0.00 | LP5     | -496 | 0.00 | REM      | -073 | 0.00 | CTSH     | -158 | 0.00 | RP124  | -058 | 0.00 | HUA-D4A | -146 | 0.00 | CTSD    | -157 | 0.00 |
| 18153 VM       | -181 | 0.00 | ASPM1    | -259 | 0.00 | CTSC     | -295 | 0.00 | RP52B   | -089 | 0.00 | COR3D1A | -479 | 0.00 | ITG1     | -169 | 0.00 | BR3      | -275 | 0.00 | RP225  | -048 | 0.00 | PEP1    | -181 | 0.00 | APU12   | -192 | 0.00 |
| 18154 CL1      | -118 | 0.00 | HUA-D9A  | -300 | 0.00 | GRM1     | -127 | 0.00 | RP129   | -080 | 0.00 | LGALS3  | -251 | 0.00 | ITGB2    | -434 | 0.00 | HUA-D4A  | -146 | 0.00 | RP120  | -068 | 0.00 | HUA-DQ1 | -230 | 0.00 | ALDH2   | -439 | 0.00 |
| 18155 CALM1    | -138 | 0.00 | SERP2    | -079 | 0.00 | S10D4B   | -347 | 0.00 | RP12    | -086 | 0.00 | CL1     | -121 | 0.00 | HUA-D8B1 | -251 | 0.00 | HUA-D4A  | -125 | 0.00 | RP18   | -046 | 0.00 | CTSH    | -140 | 0.00 | YBC3    | -340 | 0.00 |
| 18156 T0P2     | -240 | 0.00 | HUA-DQ8  | -378 | 0.00 | TH0BP    | -247 | 0.00 | LP1     | -370 | 0.00 | CD35    | -156 | 0.00 | FN1      | -115 | 0.00 | ACTR     | -082 | 0.00 | EFSD3  | -089 | 0.00 | BR3     | -167 | 0.00 | CD41    | -086 | 0.00 |
| 18157 ACT1G    | -125 | 0.00 | GN       | -341 | 0.00 | CD9      | -256 | 0.00 | ITGB2   | -359 | 0.00 | CXCA4   | -577 | 0.00 | COR3D1A  | -450 | 0.00 | RCC2     | -274 | 0.00 | RP14   | -044 | 0.00 | SPN12   | -405 | 0.00 | S10D411 | -130 | 0.00 |
| 18158 CT3      | -296 | 0.00 | LGALS3   | -233 | 0.00 | GSN      | -405 | 0.00 | MT-CC3  | -073 | 0.00 | ACTR    | -123 | 0.00 | CD31     | -479 | 0.00 | FN1      | -102 | 0.00 | RP141  | -073 | 0.00 | CD9     | -107 | 0.00 | UFAP    | -147 | 0.00 |
| 18159 RAC1     | -207 | 0.00 | APU12    | -109 | 0.00 | CTSH     | -280 | 0.00 | S10D4B  | -119 | 0.00 | PTPDC   | -488 | 0.00 | RP128    | -079 | 0.00 | EVL      | -154 | 0.00 | RP57   | -079 | 0.00 | HUA-D9A | -104 | 0.00 | S10D4B  | -094 | 0.00 |
| 18160 CT9      | -261 | 0.00 | SAT1     | -151 | 0.00 | LGALS3   | -184 | 0.00 | RAC2    | -065 | 0.00 | HCS7    | -502 | 0.00 | RAC2     | -470 | 0.00 | SPN12    | -186 | 0.00 | RP15   | -077 | 0.00 | TM2P    | -155 | 0.00 | CD3     | -246 | 0.00 |
| 18161 LDHA     | -213 | 0.00 | LGALS3   | -190 | 0.00 | CDH3     | -139 | 0.00 | FTH1    | -122 | 0.00 | EMPS    | -348 | 0.00 | RP52     | -093 | 0.00 | ITGB2    | -119 | 0.00 | RP5A   | -094 | 0.00 | CPAP    | -150 | 0.00 | FC02T   | -111 | 0.00 |
| 18162 CSU1     | -279 | 0.00 | TH0BP    | -369 | 0.00 | SAT1     | -184 | 0.00 | LAPTM5  | -204 | 0.00 | SH3BP1  | -180 | 0.00 | MT-CC2   | -070 | 0.00 | HUA-DQ1  | -110 | 0.00 | RP51B  | -063 | 0.00 | SAT1    | -146 | 0.00 | BR1     | -247 | 0.00 |
| 18163 LGALS3   | -339 | 0.00 | ANNA2    | -195 | 0.00 | SPN12    | -317 | 0.00 | CD33    | -194 | 0.00 | HUA-A   | -166 | 0.00 | HUA-D9A1 | -295 | 0.00 | LYR6     | -187 | 0.00 | RP124  | -077 | 0.00 | CAPC    | -147 | 0.00 | S10D4D  | -120 | 0.00 |
| 18164 ANNA2    | -275 | 0.00 | RP12     | -226 | 0.00 | FTH1     | -108 | 0.00 | RP52    | -100 | 0.00 | HUA-E   | -191 | 0.00 | PHD5     | -234 | 0.00 | CXCA4    | -396 | 0.00 | RP121  | -067 | 0.00 | CD14    | -182 | 0.00 | OST1    | -193 | 0.00 |
| 18165 ACT1B    | -138 | 0.00 | RAC1     | -179 | 0.00 | FC02T    | -304 | 0.00 | RP129   | -084 | 0.00 | CD37    | -502 | 0.00 | PTPDC    | -425 | 0.00 | LP1      | -430 | 0.00 | RP120  | -073 | 0.00 | CD44    | -177 | 0.00 | ASPM1   | -236 | 0.00 |
| 18166 RZ       | -311 | 0.00 | GP2      | -224 | 0.00 | RAC1     | -148 | 0.00 | COR3D1A | -085 | 0.00 | GARG    | -544 | 0.00 | HUA-D9B1 | -280 | 0.00 | IL32     | -420 | 0.00 | RP15A  | -087 | 0.00 | FTH1    | -114 | 0.00 | MT-ND4  | -059 | 0.00 |
| 18167 TM2B4X   | -136 | 0.00 | CTSC     | -231 | 0.00 | CTSC     | -257 | 0.00 | UFAP    | -251 | 0.00 | ITG1    | -248 | 0.00 | GARG     | -379 | 0.00 | HUA-A    | -127 | 0.00 | RP13A  | -077 | 0.00 | ANNA2   | -147 | 0.00 | GN      | -277 | 0.00 |
| 18168 FTH1     | -160 | 0.00 | S10D4B   | -129 | 0.00 | HSP91    | -211 | 0.00 | RP51B   | -081 | 0.00 | FN1     | -179 | 0.00 | HCS7     | -460 | 0.00 | HUA-D9A  | -153 | 0.00 | RP13A  | -085 | 0.00 | CTSH    | -101 | 0.00 | FC02T   | -152 | 0.00 |
| 18169 CD83     | -225 | 0.00 | HUA-D9B1 | -241 | 0.00 | S10D411  | -150 | 0.00 | PTPDC   | -062 | 0.00 | HUA-B   | -181 | 0.00 | CD37     | -448 | 0.00 | HUA-C    | -141 | 0.00 | RP54X  | -094 | 0.00 | PHD5    | -104 | 0.00 | PSAP    | -171 | 0.00 |
| 18170 S10D43   | -104 | 0.00 | PSAP     | -241 | 0.00 | ASPM1    | -255 | 0.00 | HCS7    | -246 | 0.00 | ARHGD3B | -289 | 0.00 | HUA-D9A  | -280 | 0.00 | HUA-D9B1 | -285 | 0.00 | RP113  | -089 | 0.00 | S10D4D  | -156 | 0.00 | QUL     | -317 | 0.00 |
| 18171 GASH1    | -148 | 0.00 | NPC2     | -145 | 0.00 | ARPC2    | -268 | 0.00 | CD37    | -402 | 0.00 | CWA     | -243 | 0.00 | CWA      | -402 | 0.00 | S10D4D   | -189 | 0.00 |        |      |      |         |      |      |         |      |      |
