# Supplementary material for: Single-cell RNA-sequencing uncovers the dynamic changes of tumour immune microenvironment in advanced lung adenocarcinoma
Source: PubMed Central journal article supplement — BMJ Open Respir Res. 2023 Dec 11;10(1):e001878. doi: 10.1136/bmjresp-2023-001878 (PMC10729175; doi:10.1136/bmjresp-2023-001878), 2023-12-11
Supplement: bmjresp-2023-001878supp015.pdf [file bmjresp-2023-001878supp015.pdf]

**Supplementary Materials**

Table S1: The number of cells in each subpopulation in different stage of LUAD. Table S2: The different expression genes in each subpopulation. Figure S1: The umap plot for integration with and/or without batch effect correction. Figure S2: IHC stain of IGHA1 and IGHG1 for three LUAD patients. Figure S3-S12: Multivariate analysis for S100P, SPP1, KLRB1, mean of CD79A and IGHA1, mean of CD79A and IGHG1, risk score in TCGA-LUAD, risk score in GSE72094, risk score in GSE31210, the proportion of S100P+ epithelial cells, and the proportion of S100P+ macrophages, respectively.
