# Supplementary figures and images for: Single-cell RNA-sequencing uncovers the dynamic changes of tumour immune microenvironment in advanced lung adenocarcinoma
Source: PubMed Central journal article supplement — BMJ Open Respir Res. 2023 Dec 11;10(1):e001878. doi: 10.1136/bmjresp-2023-001878 (PMC10729175; doi:10.1136/bmjresp-2023-001878), 2023-12-11

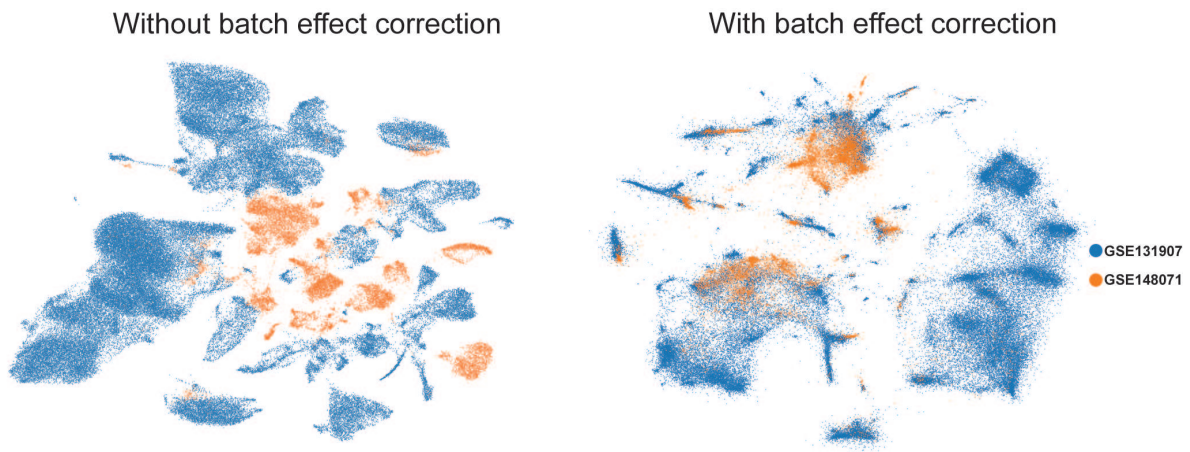

Supplement: bmjresp-2023-001878supp001.pdf [file bmjresp-2023-001878supp001.pdf]

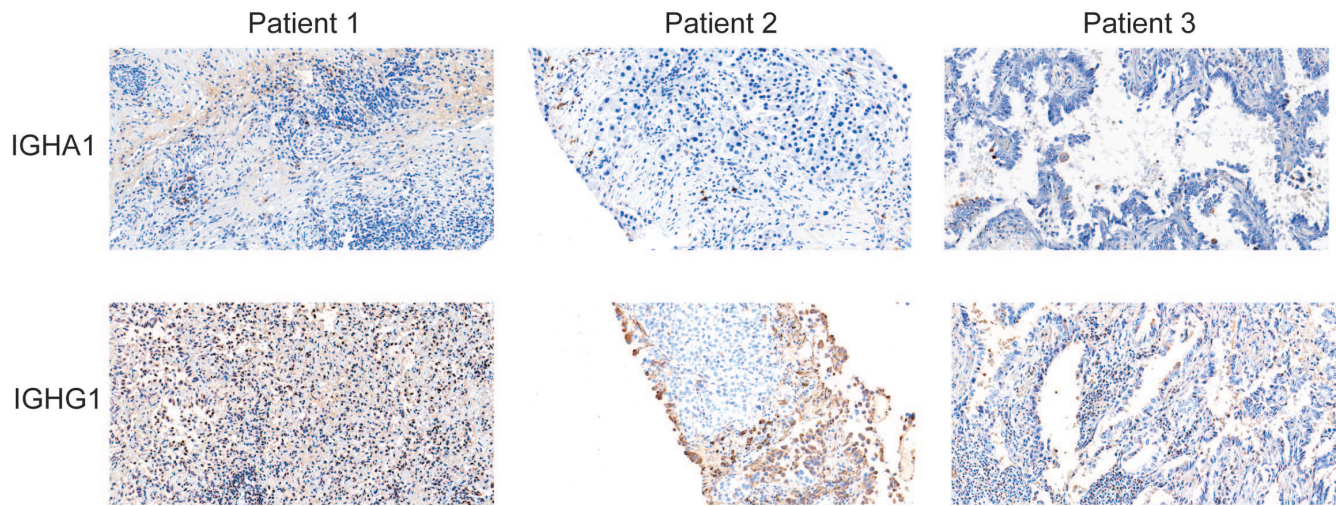

Supplement: bmjresp-2023-001878supp002.pdf [file bmjresp-2023-001878supp002.pdf]

## Hazard ratio

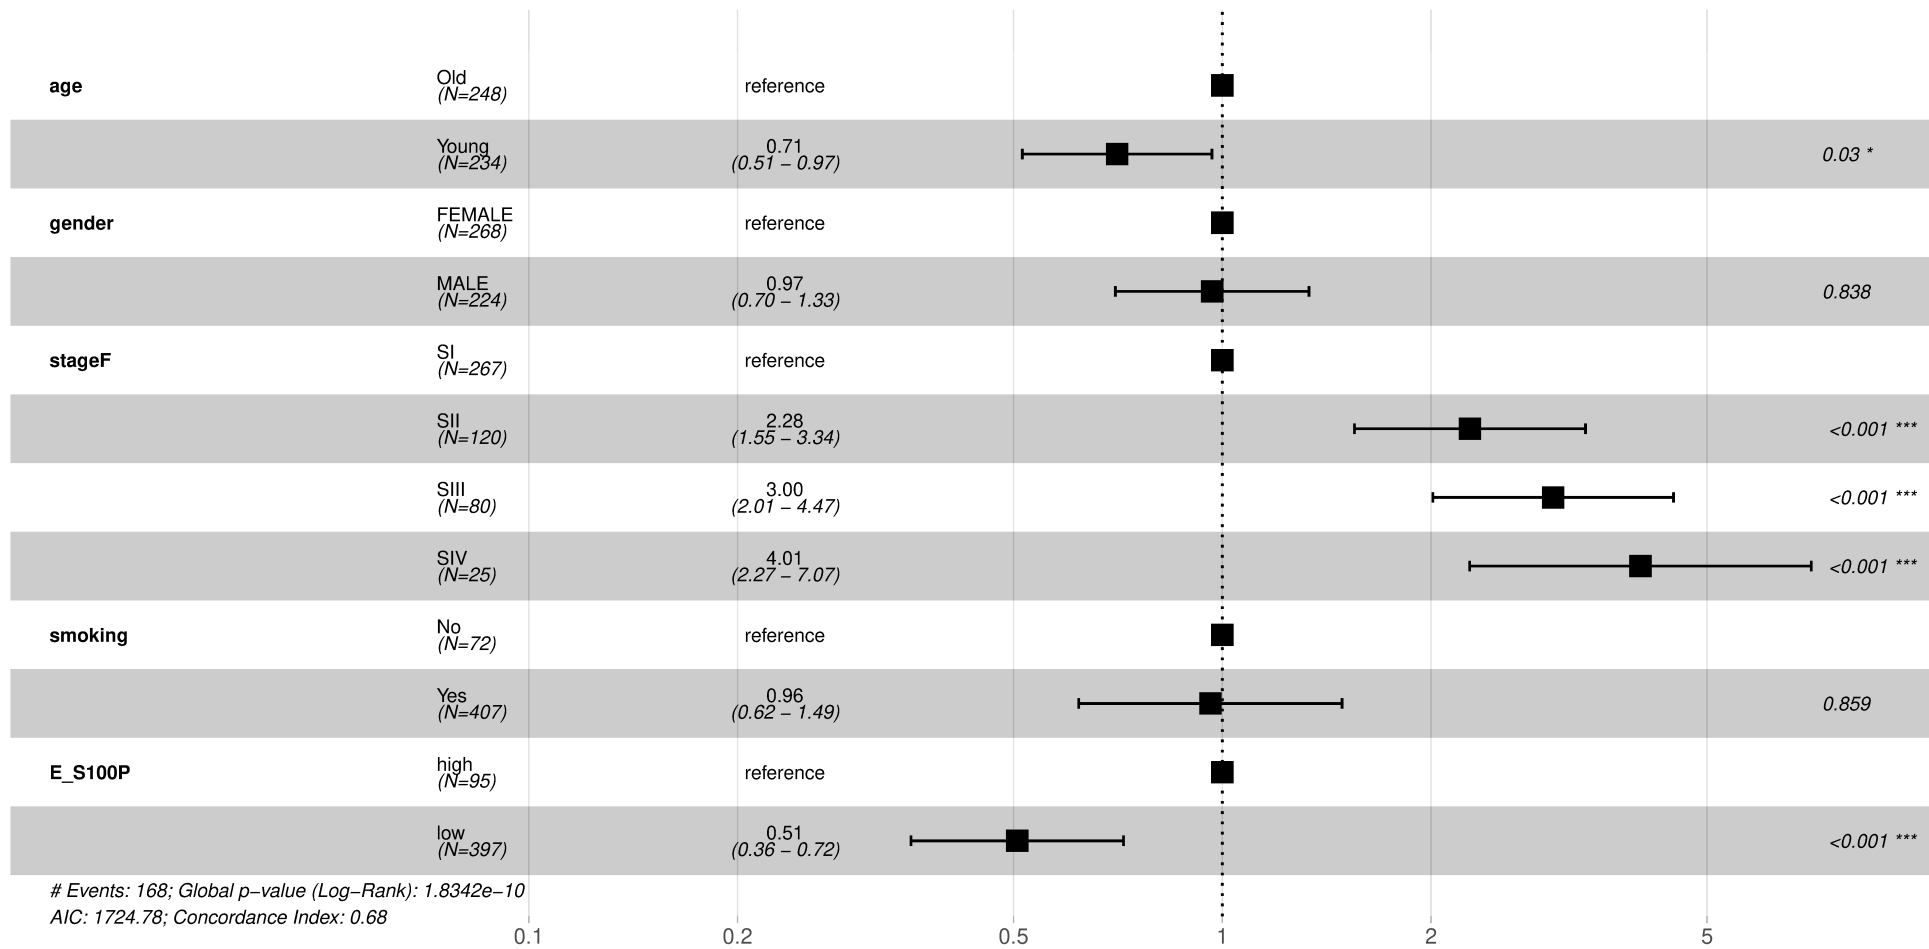

Supplement: bmjresp-2023-001878supp003.pdf [file bmjresp-2023-001878supp003.pdf]

## Hazard ratio

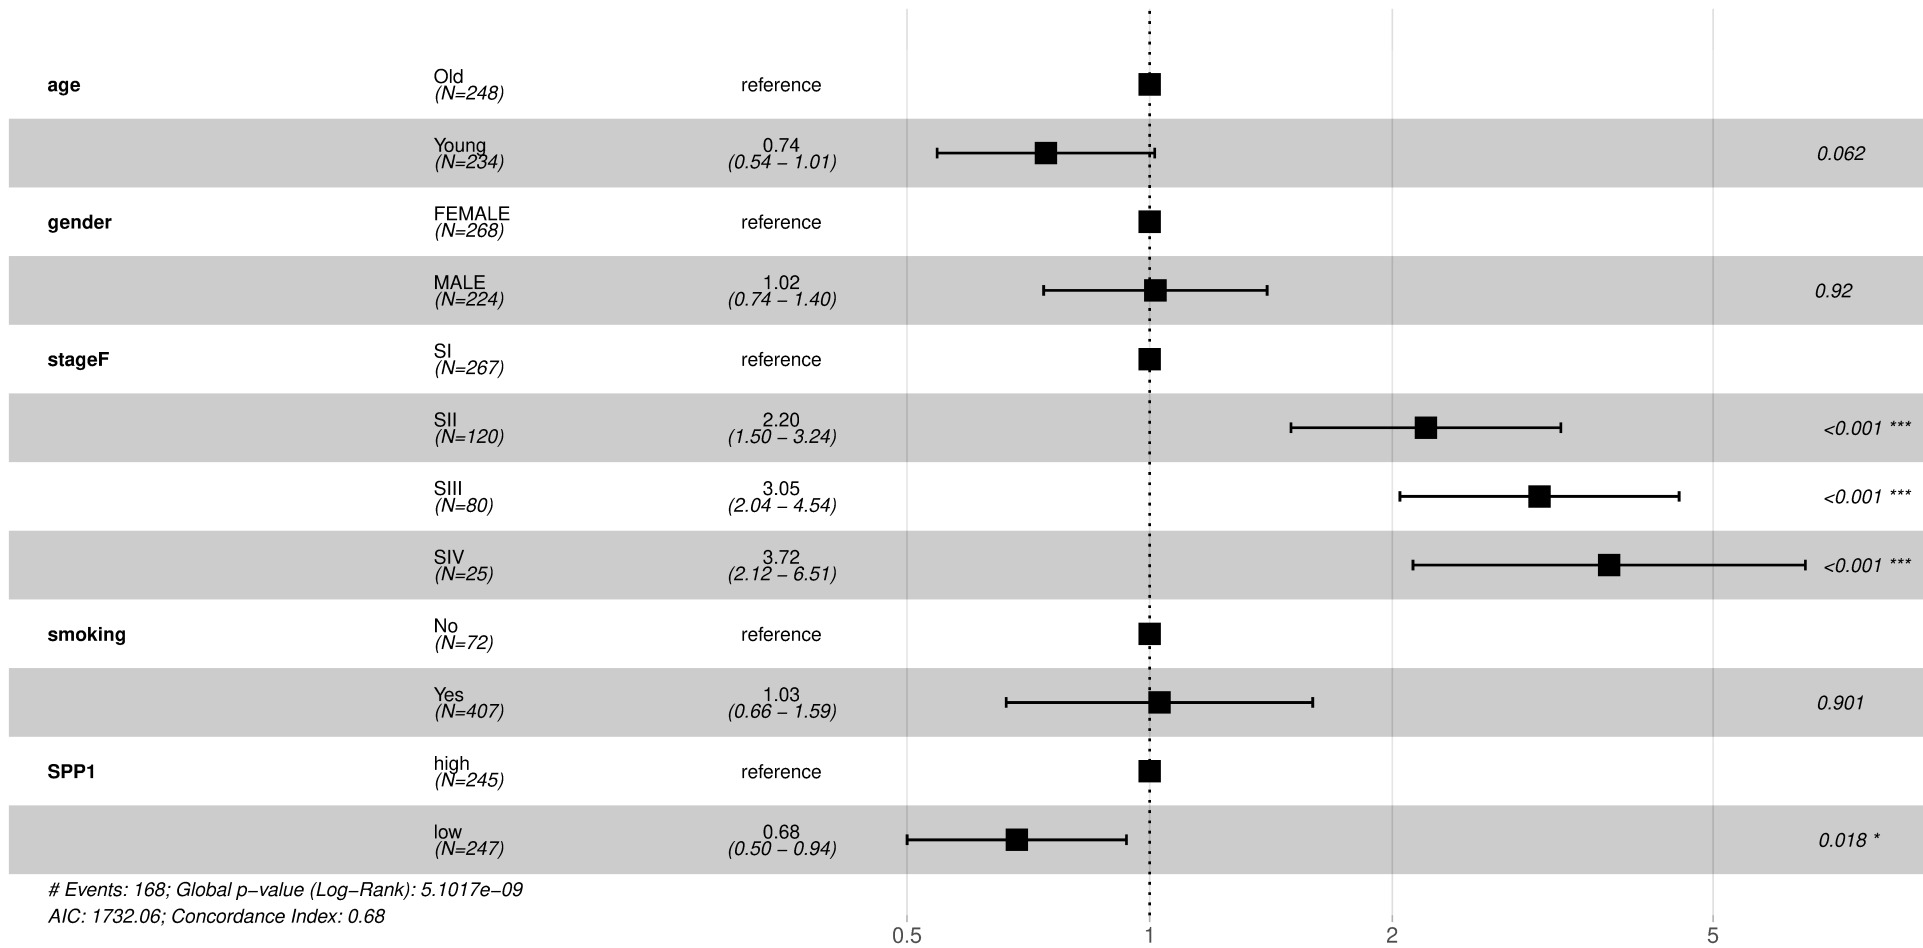

Supplement: bmjresp-2023-001878supp004.pdf [file bmjresp-2023-001878supp004.pdf]

## Hazard ratio

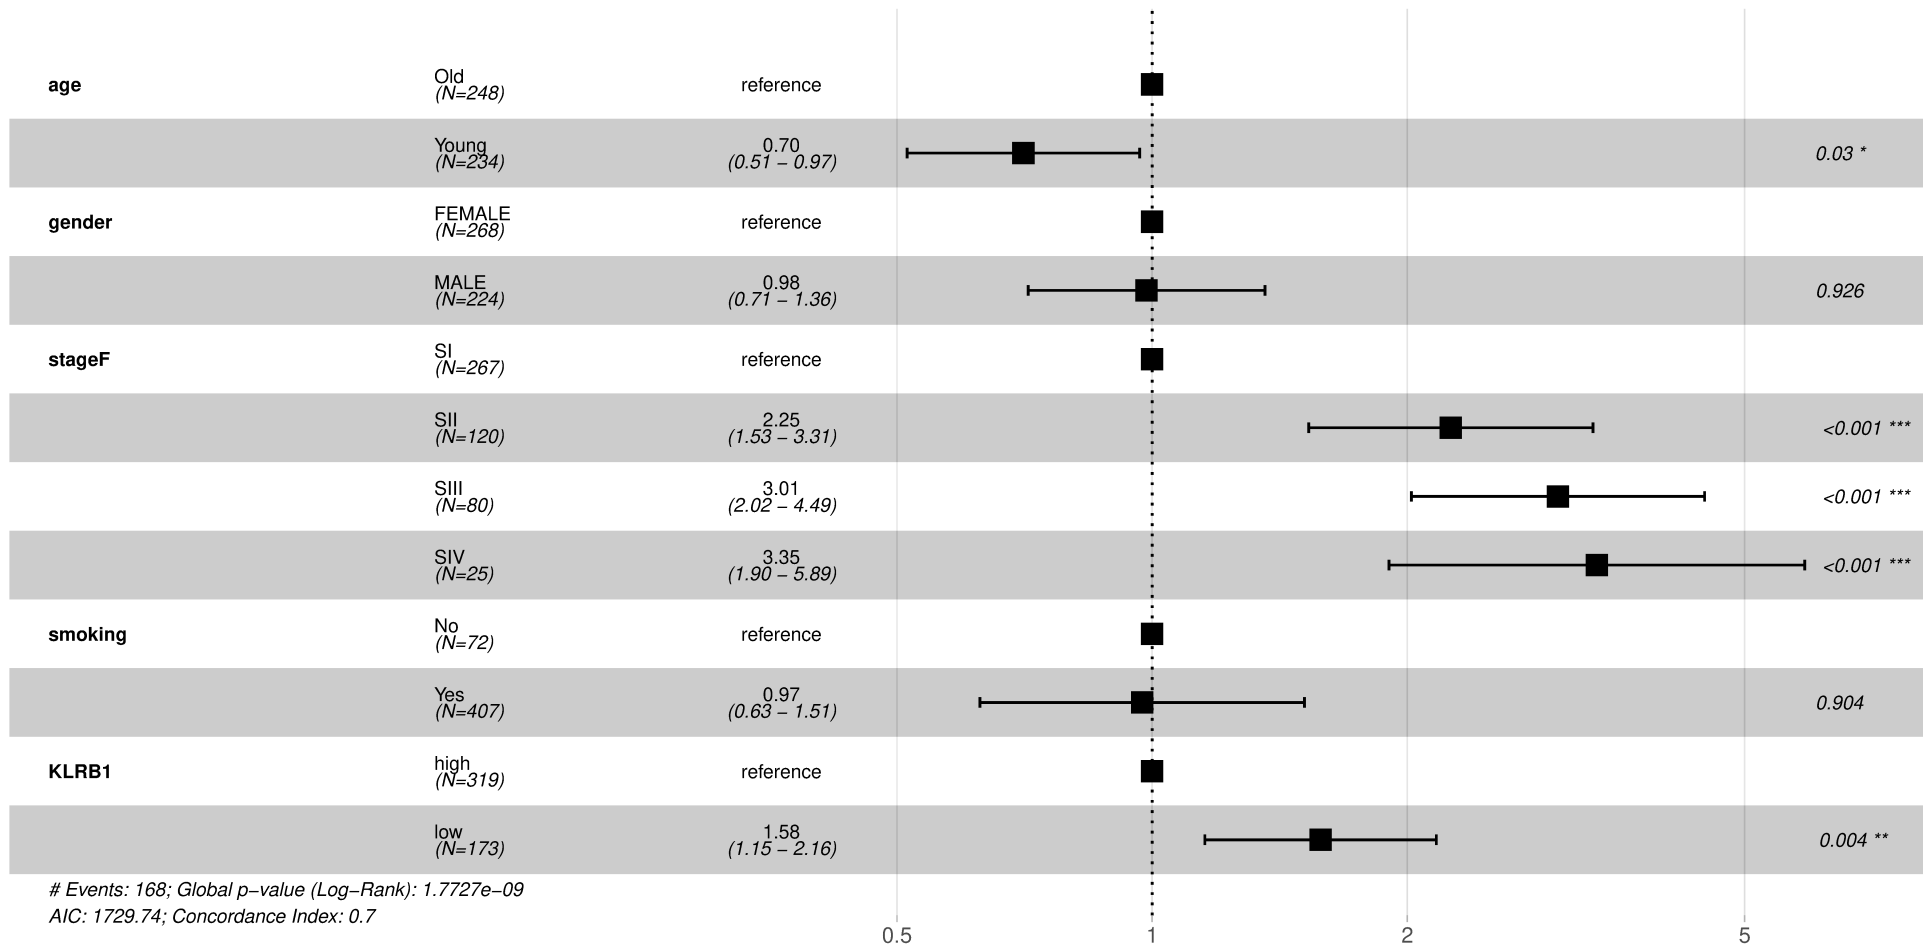

Supplement: bmjresp-2023-001878supp005.pdf [file bmjresp-2023-001878supp005.pdf]

## Hazard ratio

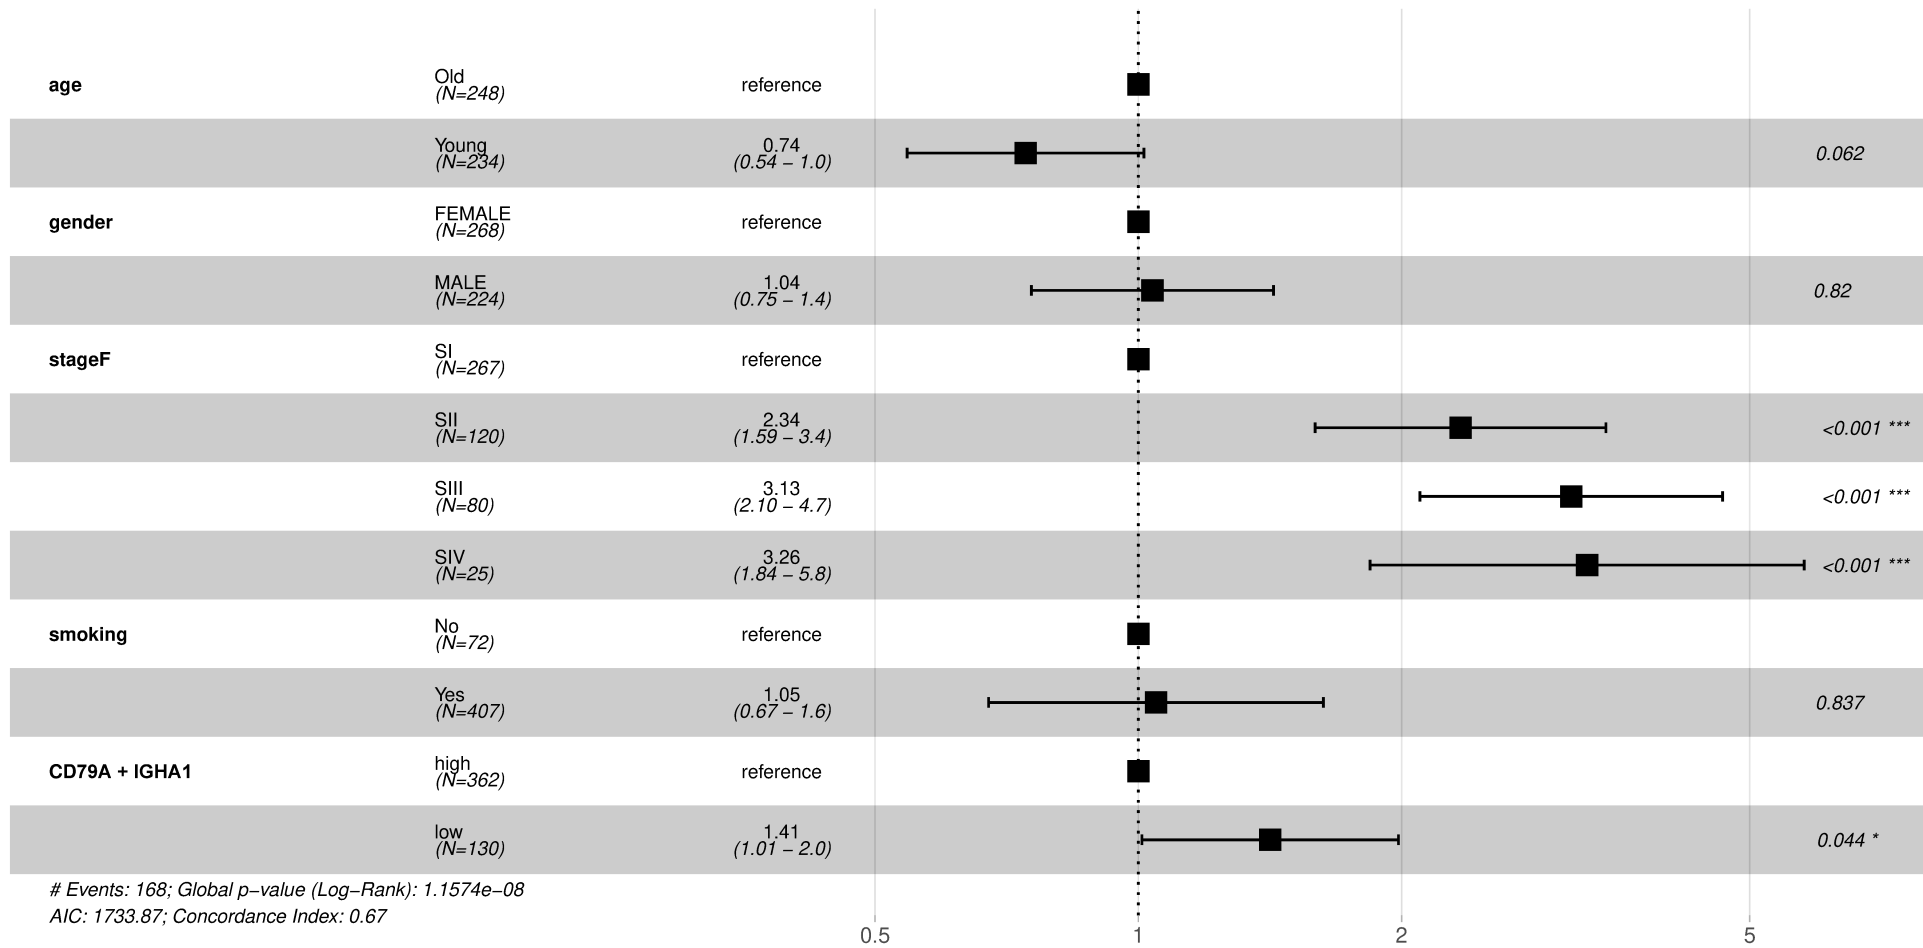

Supplement: bmjresp-2023-001878supp006.pdf [file bmjresp-2023-001878supp006.pdf]

## Hazard ratio

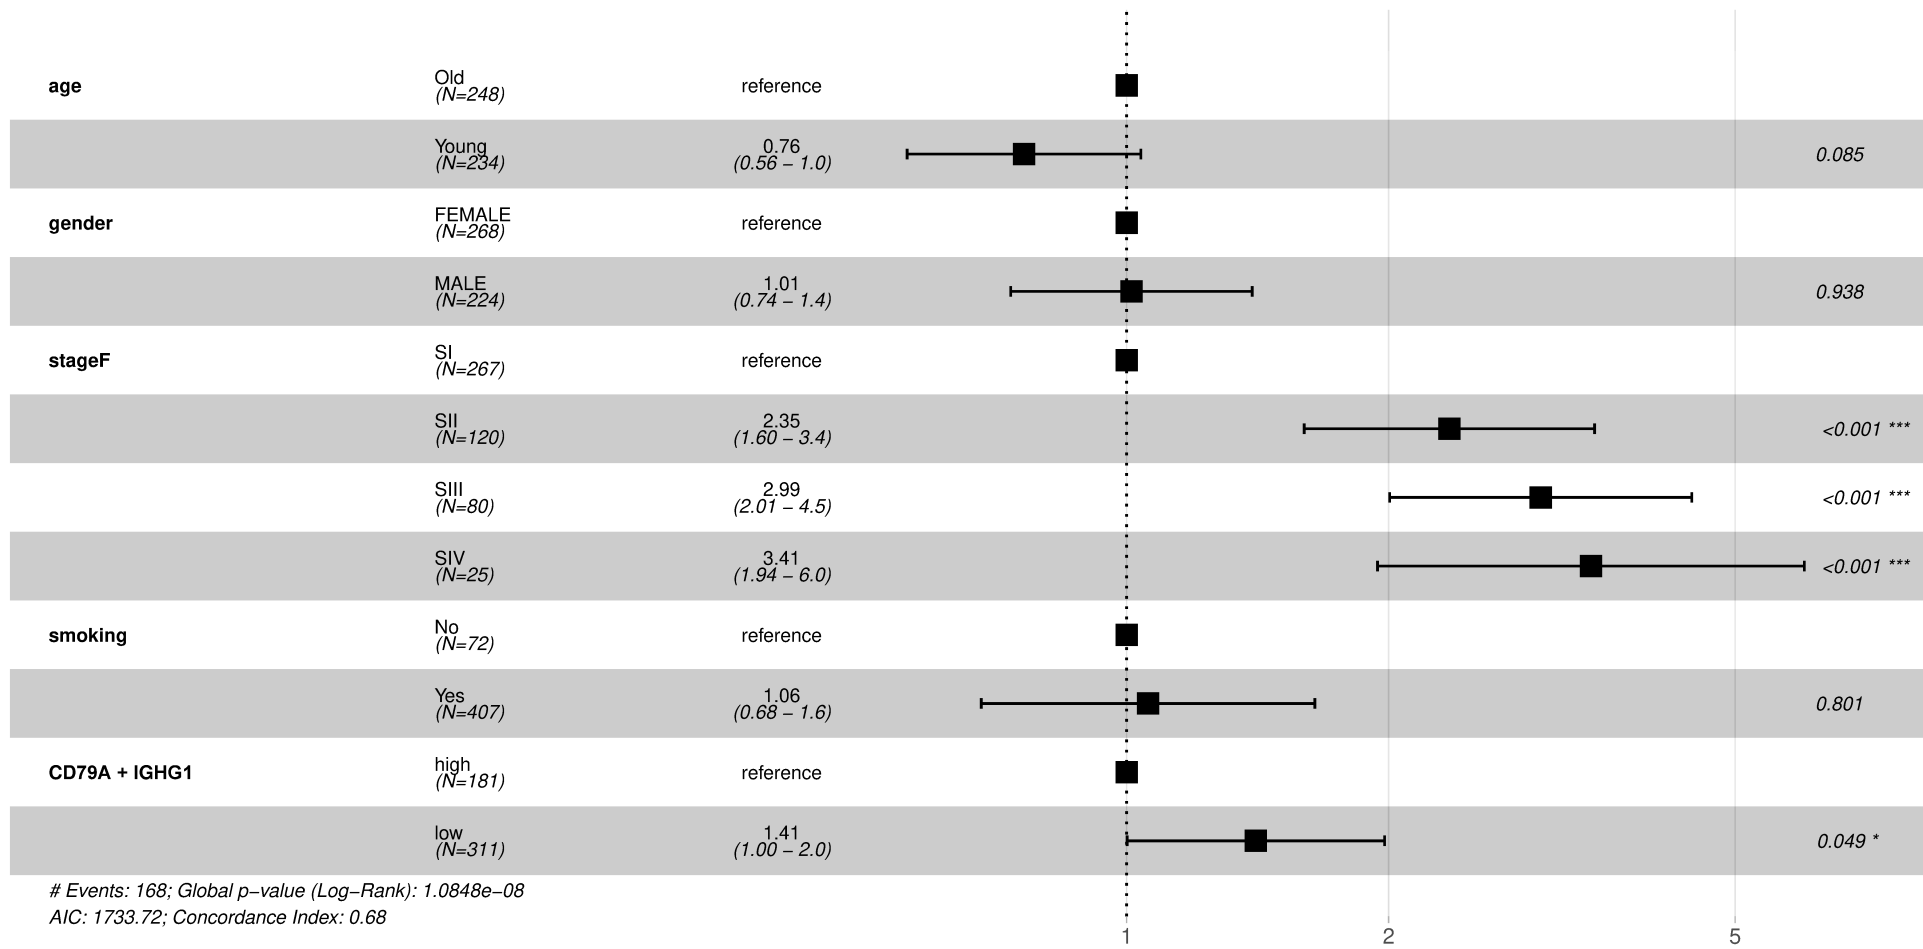

Supplement: bmjresp-2023-001878supp007.pdf [file bmjresp-2023-001878supp007.pdf]

## Hazard ratio

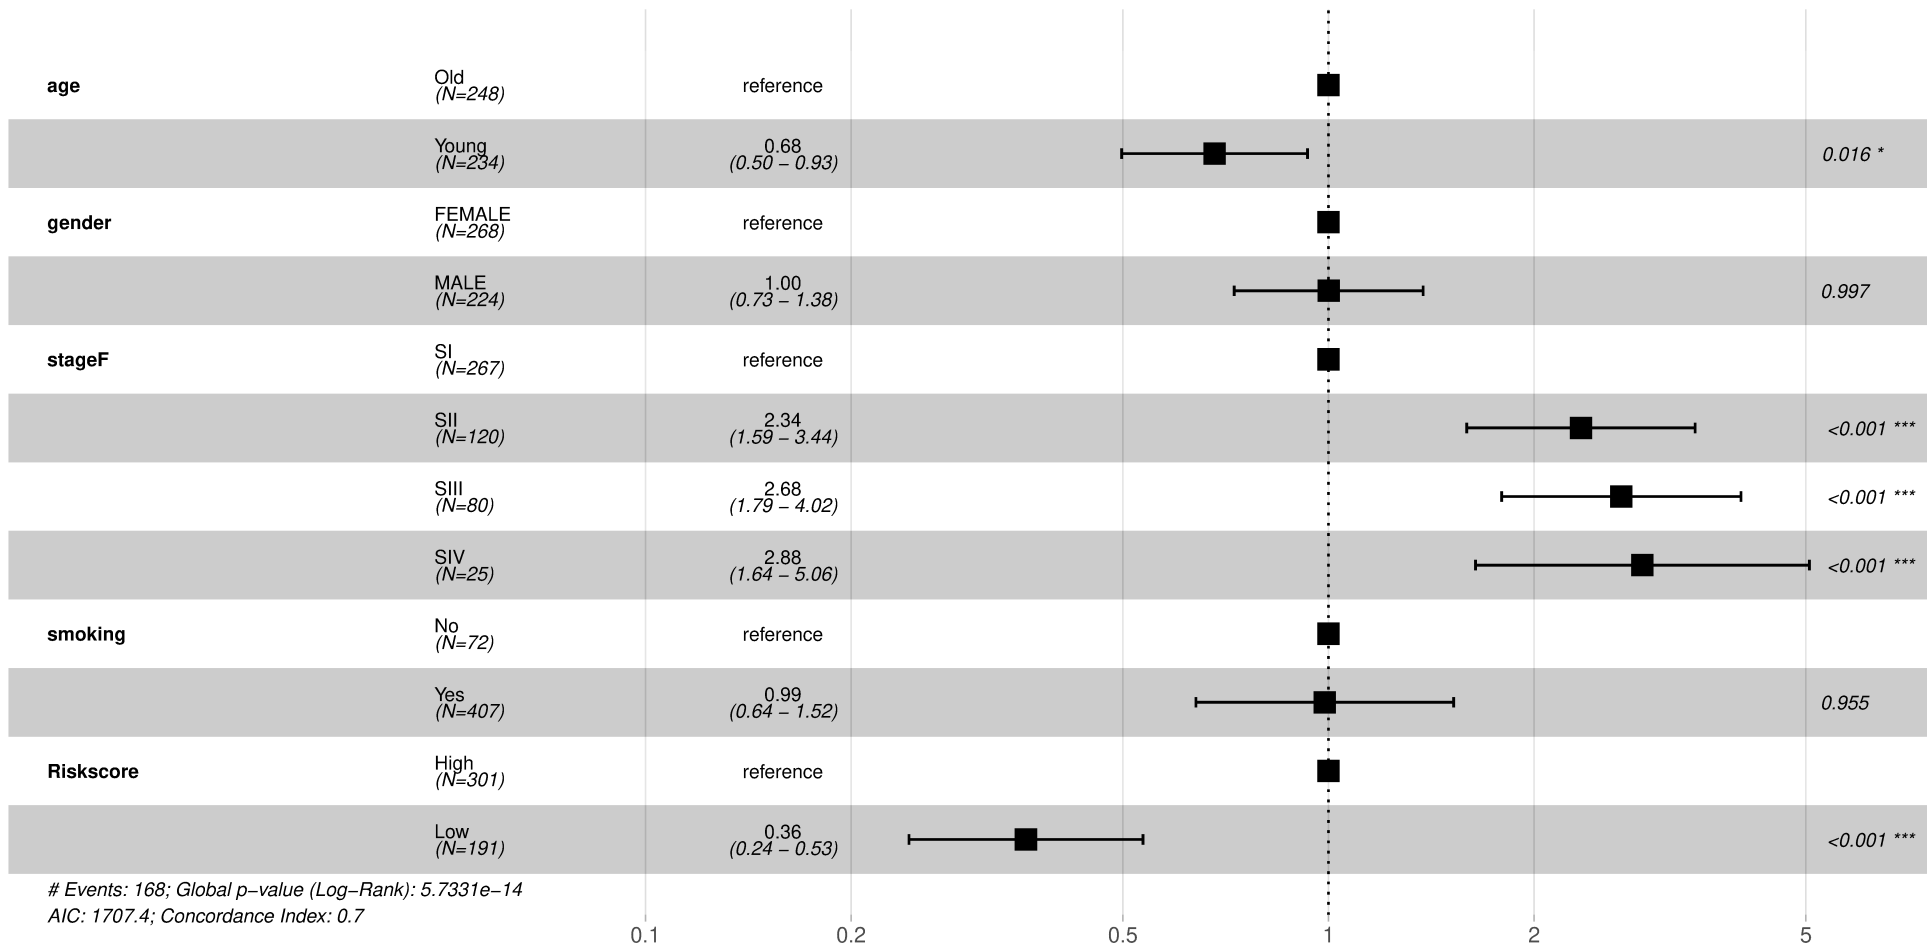

Supplement: bmjresp-2023-001878supp008.pdf [file bmjresp-2023-001878supp008.pdf]

## Hazard ratio

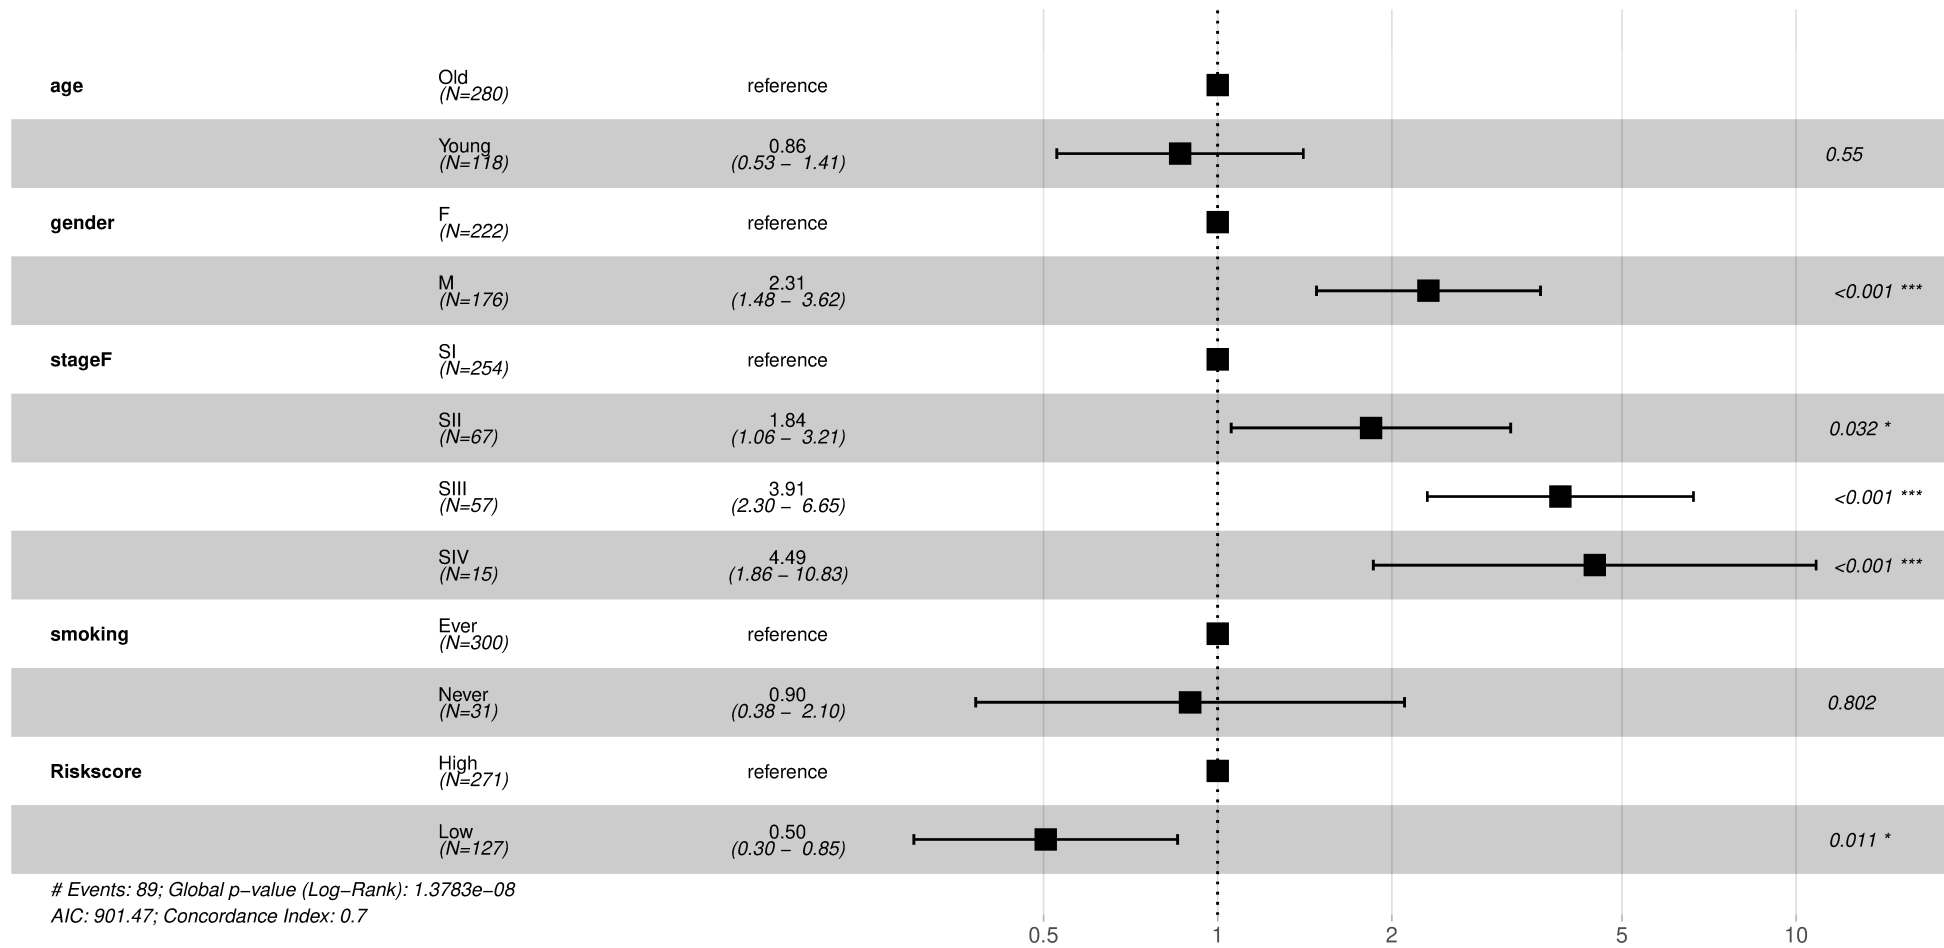

Supplement: bmjresp-2023-001878supp009.pdf [file bmjresp-2023-001878supp009.pdf]

## Hazard ratio

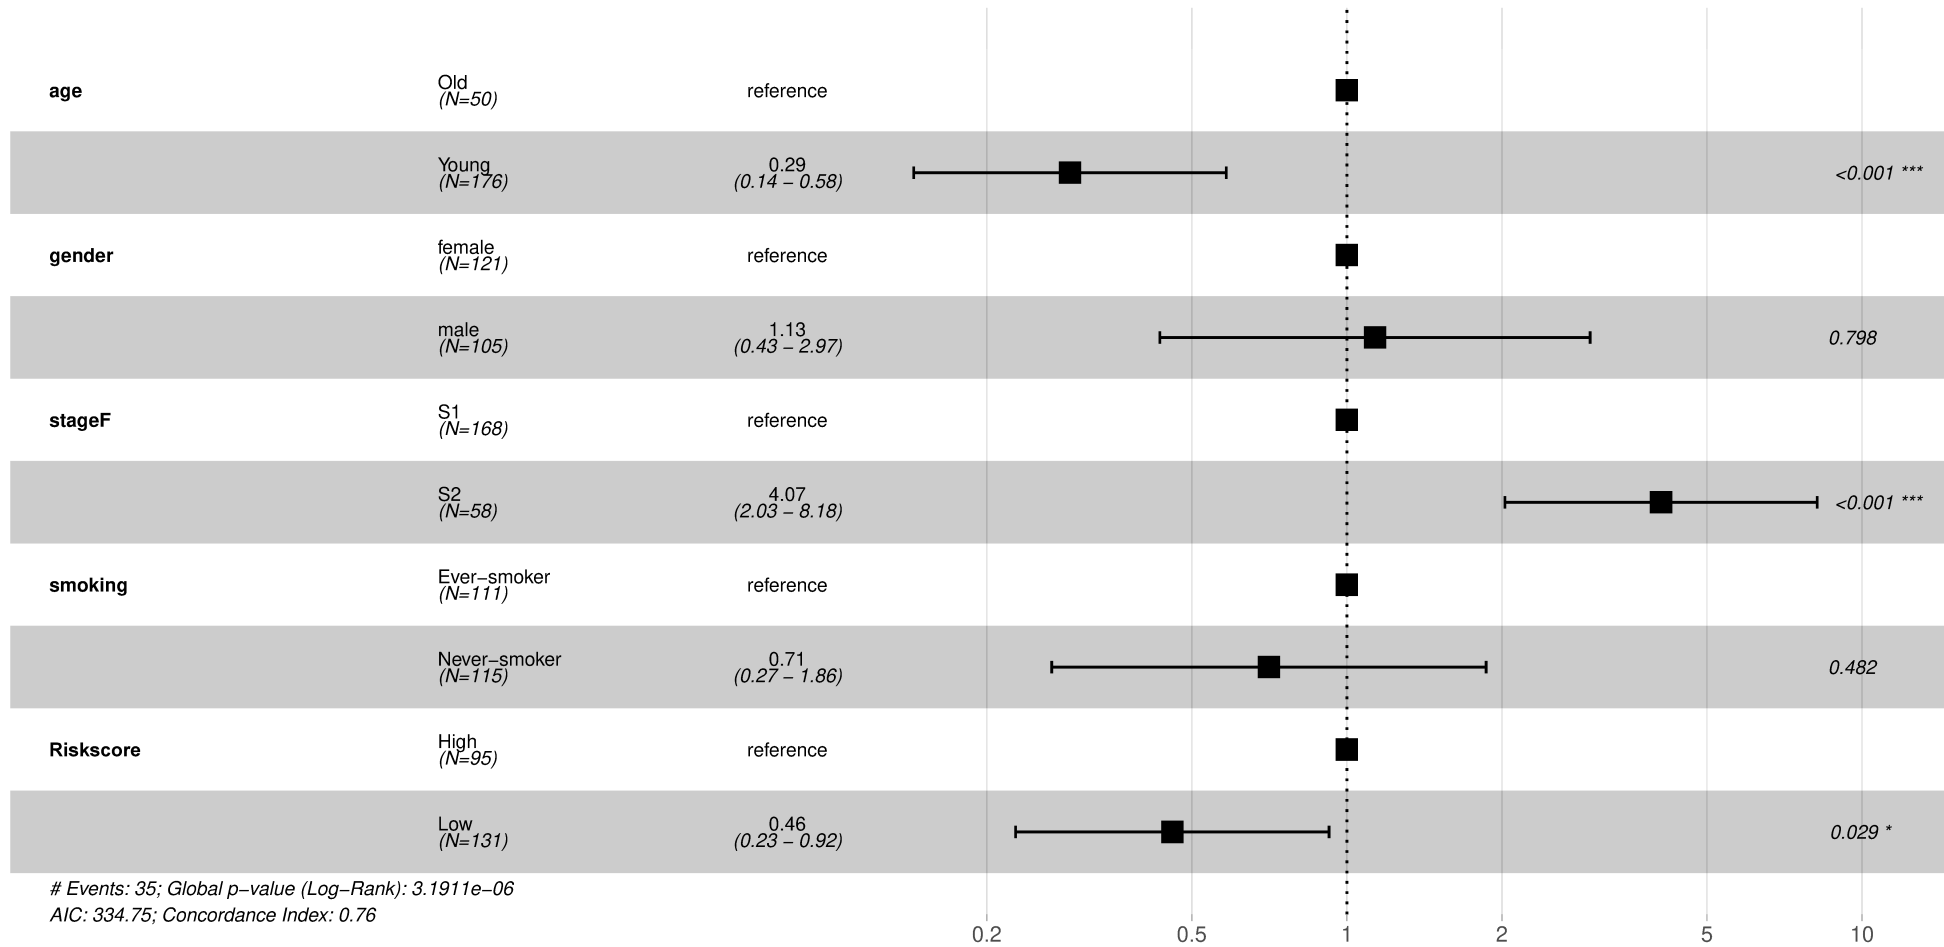

Supplement: bmjresp-2023-001878supp010.pdf [file bmjresp-2023-001878supp010.pdf]

## Hazard ratio

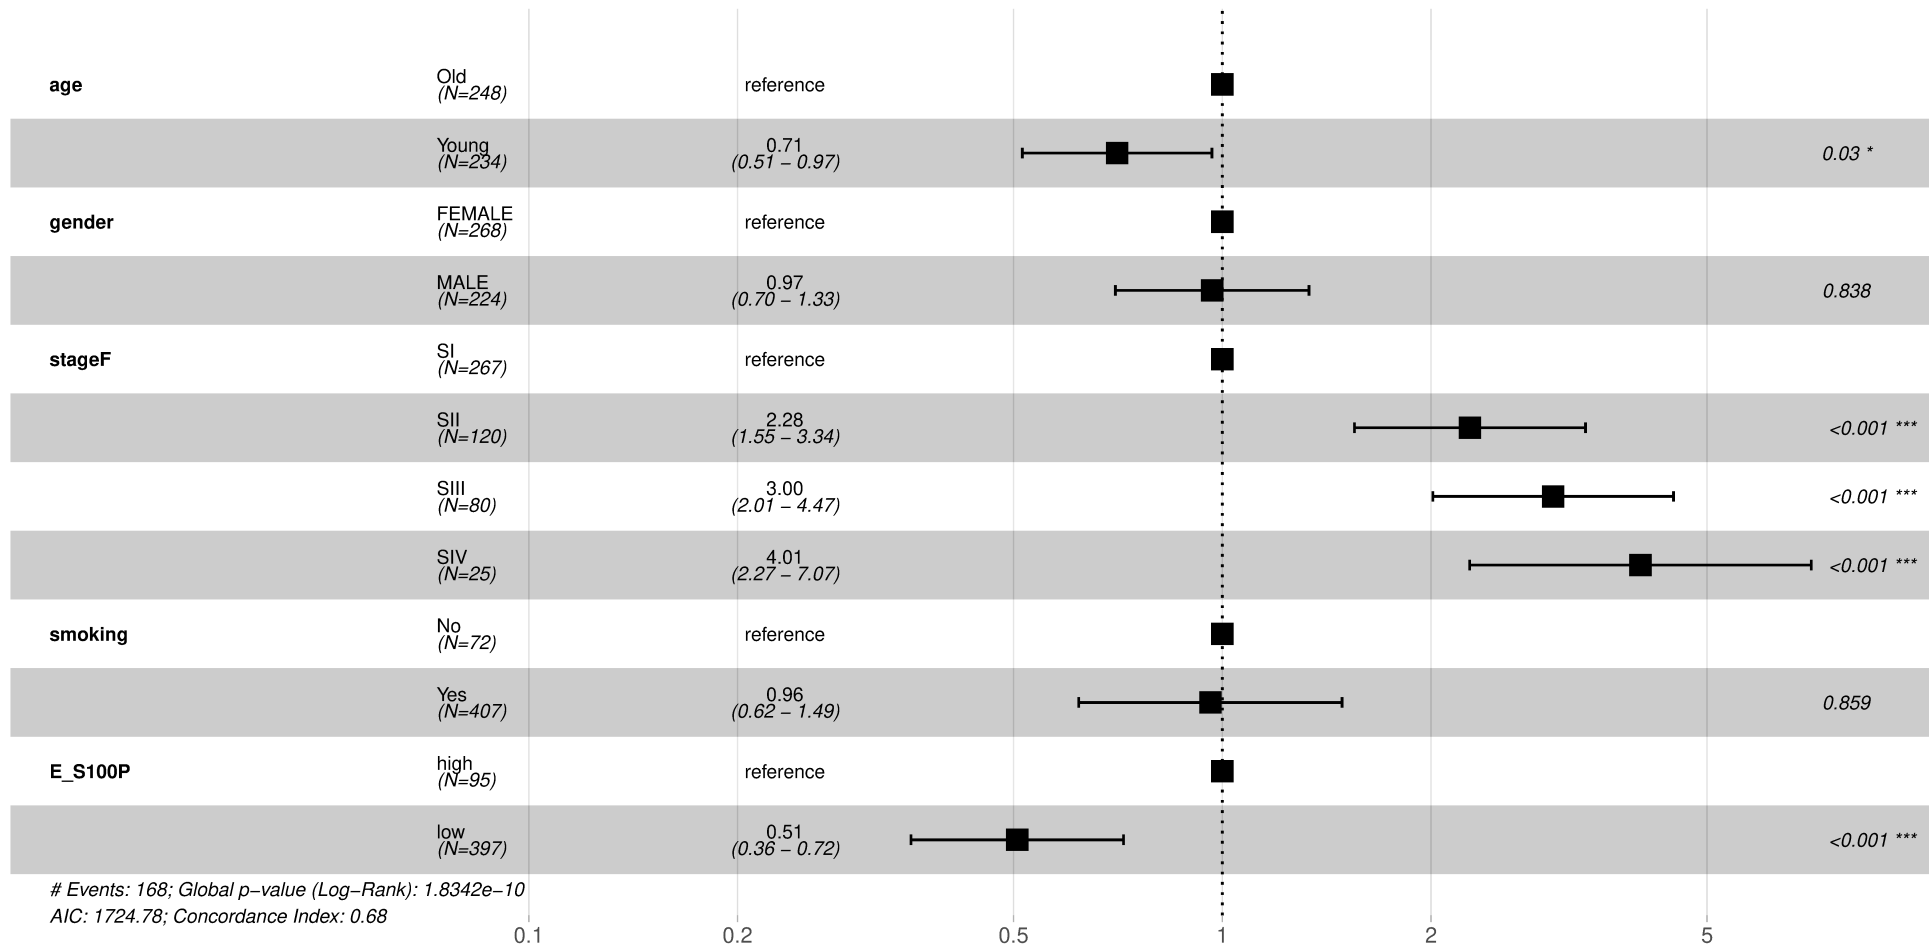

Supplement: bmjresp-2023-001878supp011.pdf [file bmjresp-2023-001878supp011.pdf]

## Hazard ratio

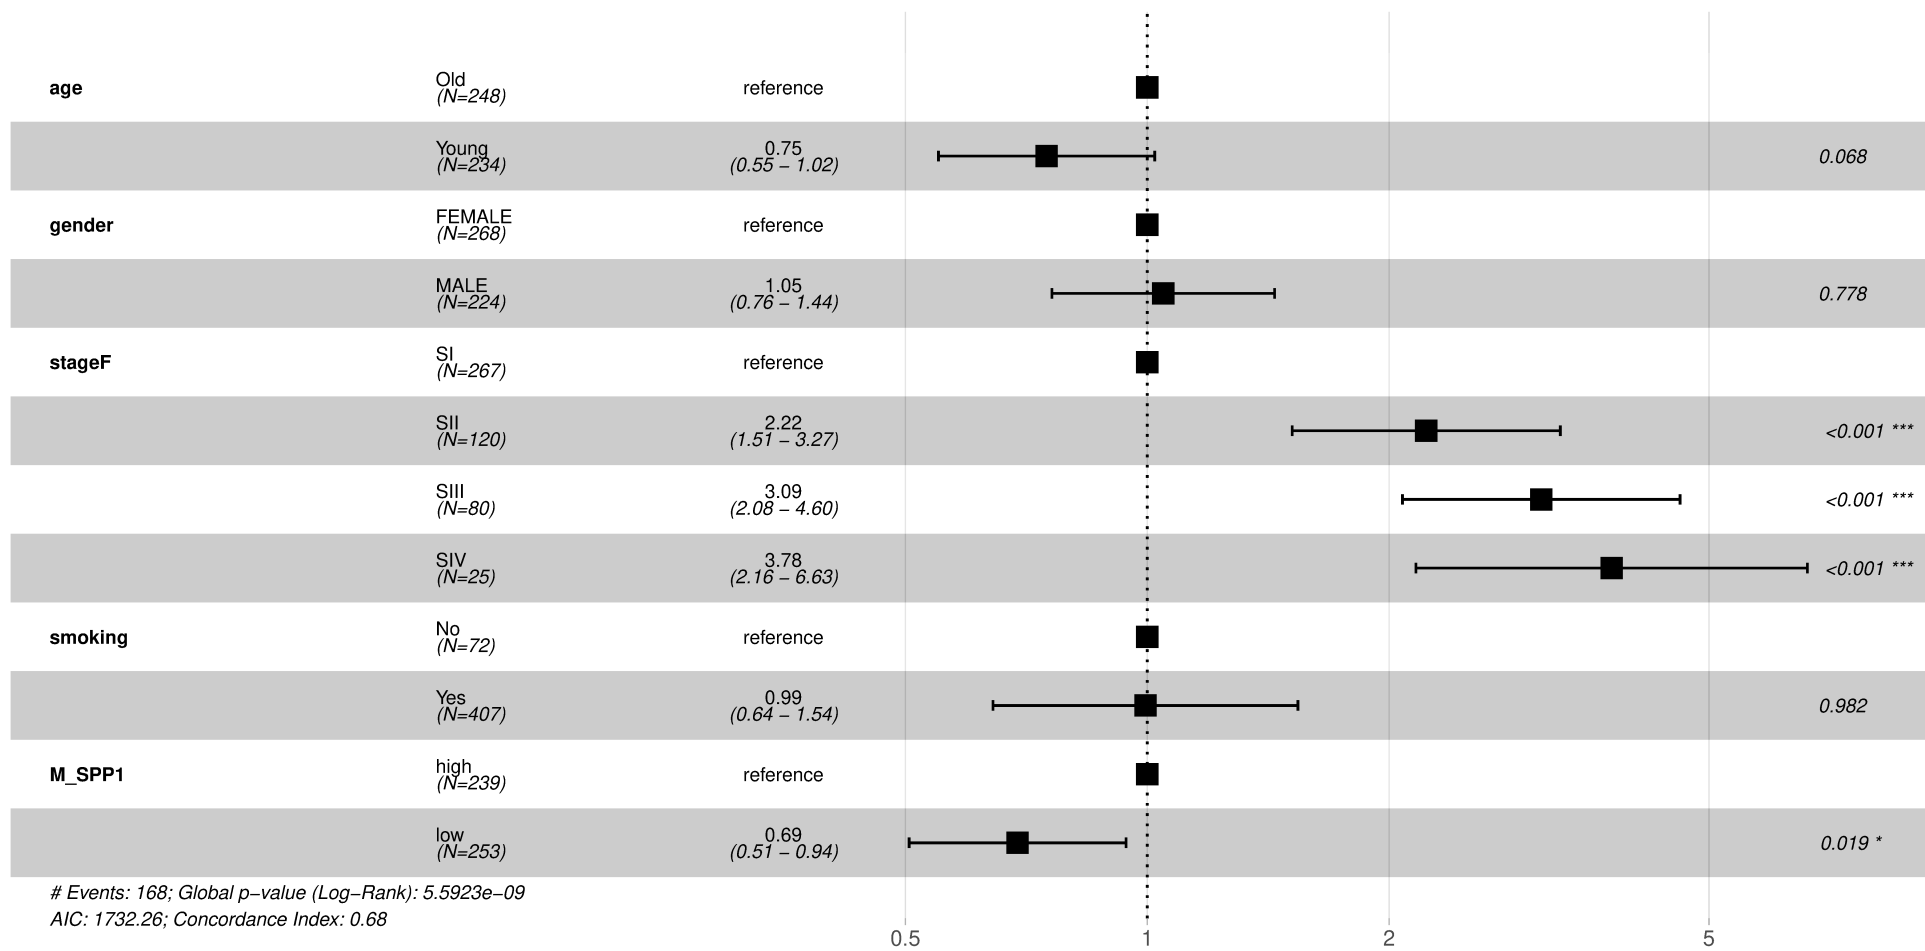

Supplement: bmjresp-2023-001878supp012.pdf [file bmjresp-2023-001878supp012.pdf]
